# Supplementary material for: Stx4 is required to regulate cardiomyocyte Ca2+ handling during vertebrate cardiac development
Source: PubMed Central journal article supplement — HGG Adv. 2022 Apr 27;3(3):100115. doi: 10.1016/j.xhgg.2022.100115 (PMC9114686; doi:10.1016/j.xhgg.2022.100115), 2022-04-27
Supplement: mmc4.pdf [file mmc4.pdf]

# Stx4 is required to regulate cardiomyocyte Ca<sup>2+</sup> handling during vertebrate cardiac development

Eliyahu Perl,<sup>1,2,3</sup> Padmapriyadarshini Ravisankar,<sup>3</sup> Manu E. Beerens,<sup>4</sup> Lejla Mulahasanovic,<sup>5,6</sup> Kelly Smallwood,<sup>7</sup> Marion Bermúdez Sasso,<sup>8</sup> Carina Wenzel,<sup>9</sup> Thomas D. Ryan,<sup>10,11</sup> Matej Komár,<sup>12</sup> Kevin E. Bove,<sup>10,13,14</sup> Calum A. MacRae,<sup>4,15,16</sup> K. Nicole Weaver,<sup>7,10</sup> Carlos E. Prada,<sup>7,10,18,19,20</sup> and Joshua S. Waxman<sup>3,10,17,\*</sup>

## Summary

Requirements for vesicle fusion within the heart remain poorly understood, despite the multitude of processes that necessitate proper intracellular trafficking within cardiomyocytes. Here, we show that Syntaxin 4 (STX4), a target-Soluble N-ethylmaleimide sensitive factor attachment receptor (t-SNARE) protein, is required for normal vertebrate cardiac conduction and vesicular transport. Two patients were identified with damaging variants in *STX4*. A patient with a homozygous R240W missense variant displayed biventricular dilated cardiomyopathy, ectopy, and runs of non-sustained ventricular tachycardia, sensorineural hearing loss, global developmental delay, and hypotonia, while a second patient displayed severe pleiotropic abnormalities and perinatal lethality. CRISPR/Cas9-generated *stx4* mutant zebrafish exhibited defects reminiscent of these patients' clinical presentations, including linearized hearts, bradycardia, otic vesicle dysgenesis, neuronal atrophy, and touch insensitivity by 3 days post fertilization. Imaging of Vamp2+ vesicles within *stx4* mutant zebrafish hearts showed reduced docking to the cardiomyocyte sarcolemma. Optical mapping of the embryonic hearts coupled with pharmacological modulation of Ca<sup>2+</sup> handling together support that zebrafish *stx4* mutants have a reduction in L-type Ca<sup>2+</sup> channel modulation. Transgenic overexpression of zebrafish Stx4<sup>R241W</sup>, analogous to the first patient's STX4<sup>R240W</sup> variant, indicated that the variant is hypomorphic. Thus, these data show an *in vivo* requirement for SNAREs in regulating normal embryonic cardiac function and that variants in *STX4* are associated with pleiotropic human disease, including cardiomyopathy.

## Introduction

Soluble N-ethylmaleimide sensitive factor attachment receptor (SNARE) proteins bridge the vesicle and plasma membrane and are crucial for processes involving intracellular membrane fusion, including neurotransmitter release.<sup>1</sup> In humans, variants in the loci of the SNARE proteins *SNAP25* (MIM: 600322), *VAMP1* (MIM: 185880), *VAMP2* (MIM: 185881), and several of their cognates have been reported to result in synaptopathies, a spectrum of diseases that typically manifest in an encephalopathy phenotype composed of severe neural defects, including hypokinesia and epilepsy.<sup>2-13</sup> While these syndromes have recently been collectively termed “SNAREopathies,”<sup>3</sup> SNAREs ubiquitously regulate vesicle fusion in virtually all cell types by mediating the fusion and subcellular localiza-

tion of various transmembrane and exocytic components to their membrane targets.<sup>14</sup> Therefore, many other extra-neuronal disease pathologies may manifest as “SNAREopathies.” Cardiomyocytes (CMs) are among the most specialized cell types owing to a high degree of organization and the dynamic requirements for their diverse function. Remarkably, while it has long been known that CMs heavily rely on intracellular membrane trafficking, few *bona fide* trafficking proteins have been identified as having specific functions in the heart.<sup>15,16</sup> SNAREs are a promising candidate for the elucidation of how cardiac intracellular trafficking is regulated. Notably, previous *in vitro* experiments suggest that SNAREs may regulate cardiac ion channel vesicle fusion, sensitivity, or gating behavior.<sup>17-23</sup> Furthermore, all voltage gated Ca<sup>2+</sup> channels (VGCCs) are reported to physically interact with the

<sup>1</sup>Medical Scientist Training Program, University of Cincinnati College of Medicine, Cincinnati, OH, USA; <sup>2</sup>Molecular and Developmental Biology Graduate Program, University of Cincinnati College of Medicine, Cincinnati, OH, USA; <sup>3</sup>Division of Molecular Cardiovascular Biology, The Heart Institute, Cincinnati Children's Hospital Medical Center, Cincinnati, OH, USA; <sup>4</sup>Cardiovascular Medicine Division, Brigham and Women's Hospital, Harvard Medical School, Boston, MA, USA; <sup>5</sup>Praxis für Humangenetik, Tübingen, Baden-Württemberg, Germany; <sup>6</sup>CeGaT GmbH, Tübingen, Baden-Württemberg, Germany; <sup>7</sup>Division of Human Genetics, Cincinnati Children's Hospital Medical Center, Cincinnati, OH, USA; <sup>8</sup>Institute for Clinical Genetics, University Hospital Carl Gustav Carus at the Technische Universität Dresden, Dresden, Saxony, Germany; <sup>9</sup>Institute of Pathology, University Hospital Carl Gustav Carus at the Technische Universität Dresden, Dresden, Germany; <sup>10</sup>Department of Pediatrics, University of Cincinnati, College of Medicine, Cincinnati, OH, USA; <sup>11</sup>Heart Institute, Cincinnati Children's Hospital Medical Center, Cincinnati, OH, USA; <sup>12</sup>Department of Gynecology and Obstetrics, University Hospital Carl Gustav Carus at the Technische Universität Dresden, Dresden, Saxony, Germany; <sup>13</sup>Division of Pathology, Cincinnati Children's Hospital Medical Center, Cincinnati, OH, USA; <sup>14</sup>Department of Pathology and Laboratory Medicine, University of Cincinnati, College of Medicine, Cincinnati, OH, USA; <sup>15</sup>Genetics and Network Medicine Divisions, Brigham and Women's Hospital, Harvard Medical School, Boston, MA, USA; <sup>16</sup>Harvard Stem Cell Institute, Boston, MA, USA; <sup>17</sup>Division of Developmental Biology, Cincinnati Children's Hospital Medical Center, Cincinnati, OH, USA

<sup>18</sup>Present address: Fundación Cardiovascular de Colombia FCV, Floridablanca, Santander, Colombia

<sup>19</sup>Present address: Division of Genetics, Birth Defects and Metabolism, Ann & Robert H. Lurie Children's Hospital of Chicago, Chicago, IL, USA

<sup>20</sup>Present address: Department of Pediatrics, Northwestern University Feinberg School of Medicine, Chicago, IL, USA

\*Correspondence: [joshua.waxman@cchmc.org](mailto:joshua.waxman@cchmc.org)

<https://doi.org/10.1016/j.xhgg.2022.100115>.

© 2022 The Author(s). This is an open access article under the CC BY-NC-ND license (<http://creativecommons.org/licenses/by-nc-nd/4.0/>).

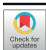

vesicle fusion machinery via common, conserved SNARE-interacting “synprint” domains,<sup>17,19</sup> although to date an interaction with cardiac VGCCs has not been examined.<sup>19</sup>

Here, we report an association between SNARE function within the heart and cardiovascular disease. We identified two patients with unique biallelic pathogenic variants in *Syntaxin 4* (*STX4* [MIM: 186591]) that showed pleiotropic defects, including one patient with early-onset biventricular dilated cardiomyopathy (DCM) that ultimately necessitated heart transplant. Engineered zebrafish *stx4* mutant embryos also have pleiotropic defects, including profound myocardial dysfunction and bradycardia. Within CMs, we found that zebrafish *stx4* mutants exhibit a significant reduction in their number of docked vesicles. Mechanistically, optical mapping demonstrated that zebrafish *stx4* mutants have aberrant Ca<sup>2+</sup> handling. Concordantly, *stx4* mutant hearts are highly sensitized to pharmacological inhibition of L-type Ca<sup>2+</sup> channels (LTCCs), while agonism of LTCCs can rescue the bradycardia. Transgenic lines expressing the zebrafish *Stx4*<sup>R421W</sup> variant (analogous to patient 1’s variant) were unable to fully rescue *stx4* mutants, suggesting that the patient’s *Stx4*<sup>R240W</sup> allele is hypomorphic. Collectively, these data provide evidence for a conserved requirement for *Stx4* in vertebrate cardiac conduction, which may provide mechanistic insights into the etiology of the cardiomyopathies found in humans with damaging *STX4* variants.

## Material and methods

### Ethics statement

Approval of research on human subjects was obtained from the institutional review boards at Cincinnati Children’s Hospital Medical Center and the Ethics Committee of the University Children’s and Women’s Center/University Hospital Carl Gustav Carus at the Technische Universität Dresden performed in compliance with the Declaration of Helsinki, and conformed to the laws and regulations of the respective countries and institutions. Written consent was obtained for all patient images. All zebrafish husbandry and experimental procedures were performed in accordance with approved Institutional Animal Care and Use Committee protocols at the Cincinnati Children’s Hospital Medical Center and the Harvard Medical Area Standing Committee on Animals.

### Genetic investigations

For the index patient (patient 1), a clinical SNP microarray (Infinium CytoSNP-850K v1.1 BeadChip [Illumina]) was performed following local protocols by the Cincinnati Children’s Hospital Medical Center cytogenetics lab. Mitochondrial DNA sequencing and clinical whole-exome sequencing (WES) was subsequently performed using a trio-based strategy by MNG Laboratories (Atlanta, GA). WES data processing, sequence alignment to GRCh37, variant filtering, prioritization by allele frequency, prediction of functional impact, and inheritance models were performed using previously reported analysis pipelines.<sup>24</sup>

Targeted variant testing was performed on patient 1’s unaffected sibling. Testing was approved by the Cincinnati Children’s Hospital Medical Center internal Institutional Review Board (protocol #2020-0390). DNA was extracted from the sibling’s saliva using a DNeasy Blood & Tissue Kit (Qiagen, 69,504). Extracted DNA

from patient 1 and DNA from an unaffected individual served as positive and negative controls, respectively. Forward and reverse primers were designed to flank patient 1’s variant (Table S3). PCR products were concentrated using a DNA Clean & Concentrator 5 (Zymo Research). Amplicons were confirmed by Sanger sequencing. Chromatograms were manually reviewed.

For patient 2, prenatal trio-WES was performed clinically on the fetus and on the parents. Trio analysis: Variants found in the patient and in the patient’s parents were compared and filtered for three cases: *de novo* in the patient, patient is compound heterozygous, patient is homozygous, and the parents are heterozygous. The coding and flanking intronic regions were enriched using in solution hybridization technology and were sequenced using the HiSeq/NovaSeq system (Illumina). Copy number variations (CNV) were computed on uniquely mapping, non-duplicate, high-quality reads using an internally developed method based on sequencing coverage depth. Briefly, reference samples were used to create a model of the expected coverage that represents wet-lab biases as well as inter-sample variation. CNV calling was performed by computing the sample’s normalized coverage profile and its deviation from the expected coverage. Genomic regions are called as variant if they deviate significantly from the expected coverage. Illumina bcl2fastq2 was used to demultiplex sequencing reads. Adapter removal was performed with Skewer.<sup>25</sup> The trimmed reads were mapped to the human reference genome (hg19) using the Burrows Wheeler Aligner.<sup>26</sup> Reads mapping to more than one location with identical mapping scores were discarded. Read duplicates that likely resulted from PCR amplification were removed. The remaining high-quality sequences were used to determine sequence variants (single nucleotide changes and small insertions/deletions). Only variants (single nucleotide variants [SNVs]/small indels) in the coding region and the flanking intronic regions ( $\pm 8$  base pairs [bp]) with a minor allele frequency (MAF)  $< 1\%$  were evaluated. Known disease-causing variants (according to the Human Gene Mutation Database) were evaluated in up to  $\pm 30$  bp of flanking regions and up to 5% MAF. All variants with an MAF  $< 1\%$  (in genes with autosomal recessive heredity) or  $< 0.1\%$  (in genes with dominant heredity) were evaluated, not including variants classified as benign or likely benign according to current literature. *In silico* prediction of variants was calculated on the basis of the output of the program’s Mutation Taster,<sup>27</sup> fathmm/fathmm-MKL coding,<sup>28</sup> Mutation Assessor,<sup>29</sup> SIFT,<sup>30</sup> LRT,<sup>31</sup> and PROVEAN<sup>32</sup> according to the following criteria: 100% consensus = pathogenic/benign,  $\geq 75\%$  consensus = mostly pathogenic/benign, consensus  $< 75\%$  or no prediction possible = inconsistent. SpliceAI was used to evaluate the consequence of variants on splicing (default [high precision] thresholds: 0.8–1 “splice effect,” 0.6–0.8 “possible splice effect,”  $< 0.6$  “no splice effect”).<sup>33</sup> For variants within a 0.5 delta score range cutoff with functional analysis unavailable to confirm a predicted splice effect, additional *in silico* predictions were employed, including MaxEntScan,<sup>34</sup> Combined Annotation Dependent Depletion (CADD),<sup>35</sup> and MutationTaster.<sup>27</sup> All variants were classified and reported based on American College of Medical Genetics and Genomics (ACMG)/Association for Clinical Genomic Sciences-2020v4.01 guidelines.<sup>36</sup>

### Zebrafish husbandry/mutant and transgenic lines used

Adult zebrafish (*Danio rerio*) were maintained under standard laboratory conditions.<sup>37</sup> The zebrafish *stx4*<sup>ci1016</sup> mutant allele was used. The following zebrafish transgenic lines were used: *Tg(-5.1myl7:dsRed2-NLS)*<sup>2</sup>,<sup>38</sup> *TgBAC(neurod:EGFP)*<sup>nl1</sup>,<sup>39</sup>

*Tg(gata1:dsRed)<sup>Δ2</sup>*,<sup>40</sup> *Tg(kdrl:EGFP)<sup>S843</sup>*,<sup>41</sup> *Tg(actb2:stx4-IRES-EGFP)<sup>ci1018</sup>*, *Tg(actb2:stx4<sup>R241W</sup>-IRES-EGFP)<sup>ci1019</sup>*. Wild-type (WT) lines used were mixed AB/TU strain.

### Generation of transgenic lines

The *Tg(actb2:stx4-IRES-EGFP)* transgenic line was created using standard Gateway cloning methods and Tol2 mediated transgenesis.<sup>42,43</sup> A *pME-stx4* middle-entry clone was generated with the coding region of *stx4* (ZDB-GENE-030131-2455). Gateway cloning was used to place the *p5E-actb2 5'*-entry clone,<sup>42</sup> *pME-stx4* middle-entry clone, and *p3E-IRES-EGFPpA 3'*-entry clone<sup>42</sup> into the *pDEST-Tol2 P2a;α-cry:dsRed* plasmid.<sup>44</sup> To generate the *Tg(actb2:stx4<sup>R241W</sup>-IRES-EGFP)* line, a QuikChange II Site-Directed Mutagenesis Kit (Agilent, 200524) was used to introduce the *stx4<sup>R241W</sup>* variant into the *actb2:stx4-IRES-EGFP* plasmid, as the template. Sanger sequencing was used to confirm the sequences of generated plasmids. To generate transgenic embryos, 50 pg of the *actb2:stx4-IRES-EGFP* or *actb2:stx4<sup>R241W</sup>-IRES-EGFP* plasmids and 25 pg of *Tol2* mRNA were co-injected into one cell stage *stx4<sup>+/-</sup>* heterozygous embryos.<sup>45</sup> F1 lines bearing dsRed in the lens and robust ubiquitous EGFP expression in ~50% of their progeny were selected, indicative of a single insertion, and maintained in hemizygoty in the *stx4<sup>+/-</sup>* background. Primers used are listed in Table S3.

### Generation of *stx4* mutant line

The *stx4* mutant allele was created with CRISPR-Cas9, using standard methods.<sup>46-48</sup> Guide RNAs (gRNAs) were designed using ChopChop, templated via PCR as previously described,<sup>46</sup> and synthesized using a MEGashortscript T7 Transcription Kit (Life Technologies, AM1354); 150 pg of each *stx4* gRNA and 6 μM Engen Spy Cas9 NLS (New England Biolabs, M0646M) was co-injected into one cell stage WT embryos. Efficacy of the gRNAs in generating deletions was determined in pooled F0 embryos by PCR. Sequencing the deletion found in F1 progeny identified a 38-bp deletion. Genotyping of the *stx4* mutant allele was performed by PCR using *stx4-t2-F1* and *stx4-t2-R1* primers (Table S3), which produce 250-bp WT and 212-bp mutant products.

### In situ hybridization

Whole-mount *in situ* hybridization (ISH) was performed using NBT/BCIP (Roche, 11383213001 and 11383221001) according to previously established protocols.<sup>49</sup> Probes for *myl7* (ZDB-GENE-991019) and *tbx2b* (ZDB-GENE-990726-27) were previously reported. Larvae were imaged using a Zeiss M2BioV12 stereomicroscope equipped with an AxioCam MRc digital camera.

### Immunohistochemistry and CM quantification

Immunohistochemistry (IHC) and CM quantification were performed as previously described.<sup>50</sup> Antibodies used included anti-acetylated tubulin, anti-Alcama, anti-cleaved Caspase3, anti-DsRed2, anti-Isl1, anti-sarcomeric myosin heavy chain (Mhc), anti-myosin heavy chain 6 (Myh6, previously called Atrial myosin heavy chain [Amhc]), an anti-zebrafish myosin heavy chain 7 (Myh7, previously called Ventricular myosin heavy chain [Vmhc]),<sup>51</sup> anti-Syntaxin 4, and anti-Vamp2. Specifications for all primary and secondary antibodies used are listed in Table S4. DAPI (Life Technologies, 1306) was used at a dilution factor of 1:10,000 to label nuclei, where indicated. Alexa Fluor-555-conjugated α-Bungarotoxin (α-Btx; Invitrogen, B35451) at a concentra-

tion of 10 μg/mL was also used. For all IHC, larvae were fixed for 1 h at room temperature in 1% formaldehyde in PBS (v/v %), washed with 0.2% saponin ([w/v %] in PBS), blocked with saponin block (0.2% saponin supplemented with 2 mg/mL bovine serum albumin and 10% [v/v %] heat-inactivated goat serum), post-fixed with 2% paraformaldehyde (v/v %), and stored in PBS, except for larvae labeled with α-Btx or cleaved Caspase-3. For α-Btx labeling, larvae were fixed overnight at 4°C in 4% paraformaldehyde (v/v %) supplemented with 1% DMSO (v/v %) in PBS, washed with PBS, and blocked with incubation buffer (2 mg/mL BSA and 0.5% Triton X-[v/v %] in 0.1M pH 7.4 phosphate buffer), as previously described.<sup>52</sup> For cleaved Caspase-3 labeling, larvae were fixed overnight at 4°C in 4% paraformaldehyde, dehydrated in a methanol series at -20°C, washed with PBS supplemented with 0.1% Tween 20 (PBST; v/v %), permeabilized with PBST supplemented with 1% DMSO (v/v %) and 0.3% Triton X-(v/v %), and blocked in PBST supplemented with 10% sheep serum (v/v %), as previously described.<sup>53</sup>

For CM quantification, embryos were mounted between two coverslips in the same manner as previously described.<sup>50</sup> Otherwise, they were immobilized in 15-well angiogenesis μ-slides (ibidi, 81501) using 1% AquaPor low melt (LM) GTAC agarose (National Diagnostics, EC-204; w/v %) in PBS, once solidified. For CM quantification and Mhy6/Myh7-labeling to assess chamber morphology, micrographs were acquired using a Zeiss M2BioV12 stereomicroscope; otherwise, micrographs were acquired using an inverted, motorized Nikon Eclipse Ti on an A1R confocal microscope equipped with a GaAsP PMT, an HD dual resonant/galvanometric scanner, and an excitation range from 405 to 640 nm, using a Plan Apo 10x/0.45 DIC L; Apo LWD 20x/0.95 WI λS; or Plan Apo VC 60x/1.2 WI DIC N2 objective. Micrographs were pseudocolored using ImageJ (for images acquired with the Zeiss stereomicroscope) or NIS Elements (for images acquired with the Nikon confocal microscope), if containing red and green channels simultaneously. For Z-stacks acquired with the Nikon confocal microscope, shot noise was removed post-imaging using the Denoise.ai function in NIS Elements.

### Quantification of Vamp+ vesicles

To quantify Vamp2+ positive vesicles, embryos were labeled with anti-Vamp2, anti-Alcama, and DAPI and mounted between two coverslips, before being imaged using an inverted, motorized Nikon Eclipse Ti on an A1R confocal microscope equipped with a Plan Apo100x/1.45 λ oil immersion objective. All Z-stacks were subsequently analyzed using Bitplane Imaris 9.3.1 (Oxford Instruments), as detailed below: Total vesicles were modeled using the spot creation tool, while nuclei number and membrane volumes were obtained from surface renderings of DAPI and Alcama labeling, respectively, to ensure a similar proportion of CMs and comparable field of view was quantified between each heart. Total vesicles were normalized to nuclei or membrane volume. To calculate the percent of vesicles close to the CM membrane, the “Spots Close to Surface” XTension was performed with a threshold set to 1.0 μm. The result of this XTension permits for the identification of clusters of objects based on the distance to the selected surface (Alcama-labeled membrane). The resulting spots located inside the threshold-defined region were calculated as a percentage of total vesicle spots, as a surrogate for vesicle clustering. Total vesicles were modeled as surface renderings and a “Surface-Surface coloc” XTension was performed to permit the masking of two surfaces to find the voxels



inside each surface that overlap (Vamp2-labeled vesicles and Alcama-labeled membrane). The resulting new surface generated from these overlapping regions was generated from this X-tension and tabulated, as a surrogate for vesicle docking.

### O-dianisidine heme staining

Larval zebrafish were developed in heme staining solution (2.5 mM *o*-dianisidine, 10 mM sodium acetate pH 5, 0.65% hydrogen peroxide [v/v %], 40% ethanol [v/v %] in water) for 15 min, washed with PBST, subsequently fixed overnight at 4°C in 4% paraformaldehyde, and washed and stored in PBST, as previously described,<sup>54</sup> before being imaged by brightfield using a Zeiss M2BioV12 stereomicroscope.

### Heart rate measurements

For heart rate measurements, 72 h postfertilization (hpf) larvae were anesthetized with 0.16 mg/mL tricaine (MS-222) and immobilized in 15-well angiogenesis  $\mu$ -Slides using 1% low melt agarose in embryo water (Milli-Q [Millipore] water supplemented with 0.0001% methylene blue [w/v %] and 0.03% Instant-ocean [w/v %]). Larvae were assayed in embryo water or with drugs at concentrations described below. Hearts were imaged by phase contrast using a Plan Flour 20x/0.5 Ph1 DLL objective on an inverted, motorized Nikon Ti-2 SpectraX Widefield microscope equipped with an Andor Xyla 4.2 megapixel, 16-bit sCMOS monochromatic camera. Larvae were equilibrated for 5 min at thermoneutral conditions (28.5°C) in a temperature-controlled chamber prior to high-speed time-lapse imaging. For each acquisition, 500 frames were captured at 2x2 binning with a 17- to 20-ms exposure, using a 12-bit rolling shutter and a 540 Mhz readout. Heart rates were quantified as beats per minute from kymographs obtained from ventricular regions of interest of time measurements that were recorded using NIS Elements.

### Drug treatments

At 72 hpf, larvae were treated with the following: 500  $\mu$ M ( $\pm$ )-isoproterenol hydrochloride (Sigma Aldrich, I5627); 100 nM, 1  $\mu$ M, 5  $\mu$ M, or 10  $\mu$ M of the L-type  $Ca^{2+}$  channel (LTCC) blocker nifedipine (Sigma Aldrich, N7634); 20  $\mu$ M of LTCC agonist ( $\pm$ )-Bay K-8644 (AG Scientific, B-1019); 10  $\mu$ M thapsigargin (Sigma Aldrich, T9033) and 10 mM caffeine (Sigma Aldrich, C0750), indicated as TgC; or 10  $\mu$ M or 20  $\mu$ M T-type  $Ca^{2+}$  channel antagonist NNC 55-0396 dihydrochloride (Tocris, 2268). All stocks were made with DMSO prior to diluting at the indicated concentrations in embryo water. Control larvae were treated with 1% DMSO in embryo water. Except for isoproterenol treatments, all larvae were treated prior to assaying heart rates for 45 min at 28.5°C, similar to what has been reported.<sup>55</sup> For isoproterenol treatments, heart rates were assayed both at baseline and following 30 min of treatment at 28.5°C, as previously reported.<sup>56</sup>

### Calcium imaging

Embryonic hearts were explanted with calcium imaging using ratiometric dyes and analysis performed as previously described.<sup>55</sup> Briefly, hearts were stained for 20 min with 50  $\mu$ M Fura-2,AM (Invitrogen) and washed with Normal Tyrode's solution (NTS; 136 mM  $Na^+$ , 5.4 mM  $K^+$ , 1.0 mM  $Mg^{2+}$ , 0.3 mM  $PO_4^{3-}$ , 1.8 mM  $Ca^{2+}$ , 5.0 mM glucose, and 10.0 mM HEPES, pH 7.4) at room temperature for 45 min. Individual hearts were transferred into perfusion chambers (Warner Instruments, RC-49MFS), con-

taining NTS supplemented with 1 mM Cytochalasin D to inhibit contraction. Perfusion chambers were mounted on a Nikon TE-2000 inverted microscope equipped with a 120 W metal halide lamp (X-Cite 120, Exfo). A high-speed monochromator (Optoscan, Cairn Research Ltd, UK) was used to rapidly switch the excitation wavelength between 340 nm and 380 nm, with a bandwidth of 20 nm and at a frequency of 500 Hz. The excitation light was reflected by a 400-nm cutoff dichroic mirror with the fluorescence emission collected through a 510/580-nm emission filter using a high-speed 80x80 pixel charge-coupled device (CCD) camera (CardioCCD-SMQ, RedShirtImaging) at 14-bit resolution to obtain four frames per acquisition, resulting in a final ratio rate of 125 Hz. For quantification, images were analyzed with MATLAB 2018b (MathWorks) using customized software, as previously described.<sup>55</sup>

### Conventional histopathology and transmission electron microscopy

All biopsy tissue was processed and imaged in a CAP/CLIA-certified laboratory in the Division of Pathology at Cincinnati Children's, or in the Institute of Pathology at the University Hospital Carl Gustav Carus. For the succinic dehydrogenase staining (SDH), fresh striated muscle biopsy tissue was snap-frozen in 2-methylbutane, sectioned at a thickness of 10  $\mu$ M, and stained according to standard methodologies.<sup>57</sup> For H&E staining, tissues were formalin-fixed, imbedded in paraffin, sectioned to a thickness of 4 to 5  $\mu$ M, and stained according to standard methodologies.<sup>57</sup> Brightfield images were acquired using an ScanScope XT Slide Scanner (Aperio, Leica Biosystems). For ultrastructural examination, muscle tissues were fixed in 3% glutaraldehyde in cacodylate buffer, post-fixed in 1% osmium tetroxide, dehydrated in graded ethanol, epon LX112 resin (Ladd Research Industries Inc) embedded, semithin and ultrathin cut, stained with uranyl acetate and lead citrate, and examined on a Hitachi transmission electron microscope (H-7650; Hitachi High Technologies) equipped with a TEM CCD camera (Advanced Microscopy Techniques), in accordance with standard protocols.<sup>58</sup>

### RT-qPCR

RNA was extracted from whole WT (non-transgenic) and *actb2:stx4<sup>R241W</sup>-IRES-EGFP* embryos at 72 hpf using TRIzol (Invitrogen, 15596026), as previously described.<sup>59</sup> cDNA was prepared using a SuperScript IV kit (Invitrogen, 18091200) and amplified with oligo d(T)<sub>20</sub> primers. RT-qPCR using SYBR green PCR master mix (Applied Biosystems, 4368706) was performed under standard PCR conditions using a Bio-Rad CFX PCR system. Relative expression levels of endogenous *stx4* and transgenic *stx4<sup>R241W</sup>-IRES-EGFP* were run in technical triplicates, standardized to *actb2* ( $\beta$ -actin), and quantified using the  $2^{-\Delta\Delta CT}$  Livak Method.<sup>60</sup> Primers used for *stx4* (to endogenous *stx4*) and *GFP* (to *stx4<sup>R241W</sup>-IRES-EGFP*) are listed in Table S3.

### Statistical analysis

All statistical analyses were performed using GraphPad Prism (version 9.2.0). Data are represented as mean  $\pm$  SEM, unless otherwise reported in the figure legend. A minimum of four biological replicates were performed for each experiment. For comparisons between two groups, a 2-tailed Student's t test was performed with the exception of the survival curve, which employed a Log rank (Mantel-Cox) test. For comparisons

### A Patient 1

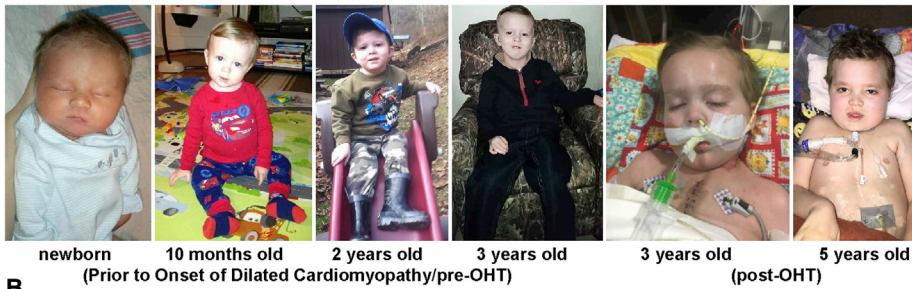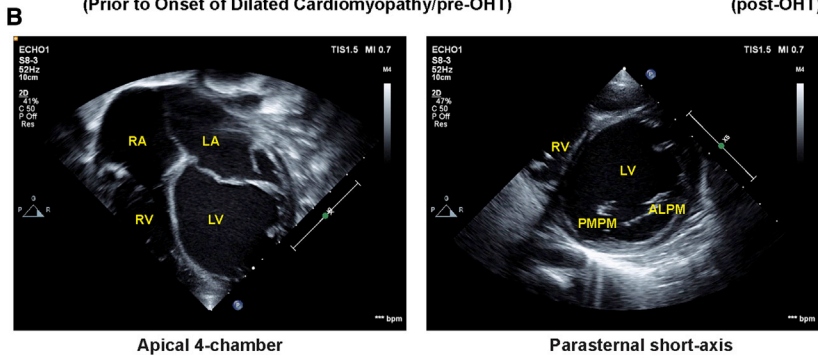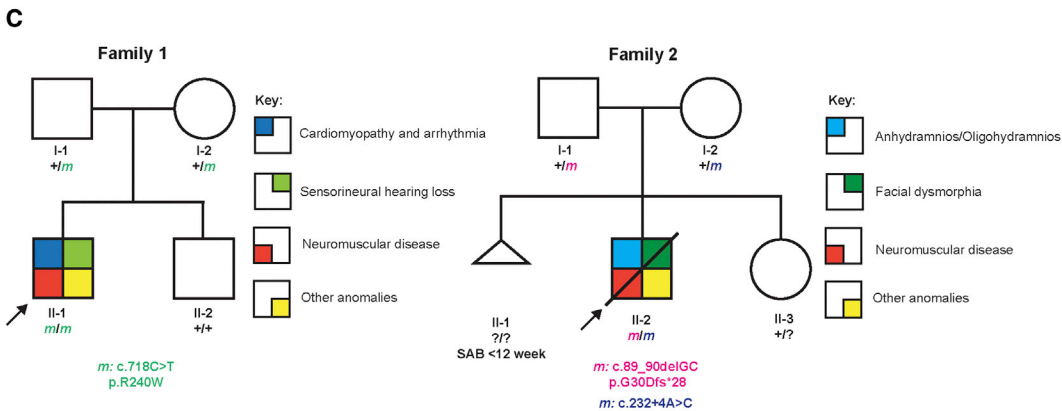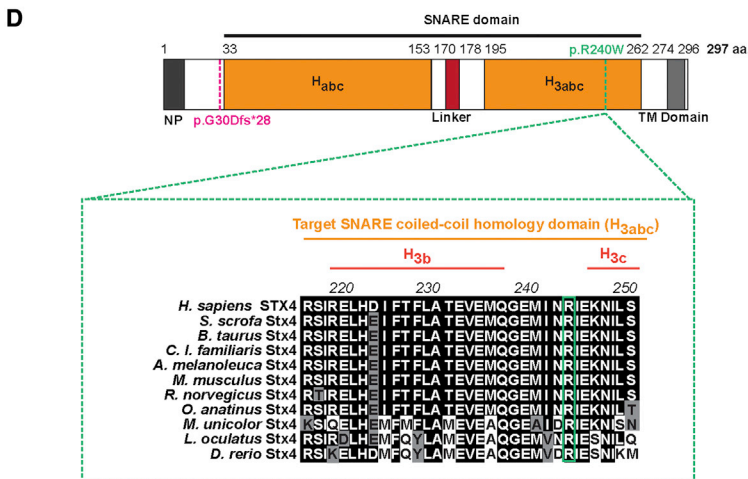

**Figure 1. STX4 germline variants in patients**

(A) Left to right: Photographs of patient 1 taken before and after onset of DCM, and pre- and post-OHT.

(B) Echocardiograms at onset of patient's admission due to heart failure. Left: Apical 4-chamber view at end-diastole showed severely dilated, thin-walled left ventricle and severely dilated left and right atria. Right: parasternal short-axis view at the level of the mitral valve at end-diastole showed severely dilated, thin-walled left ventricle. The patient had severe biventricular systolic dysfunction, and evidence for diastolic dysfunction (biatrial dilation). ALPM, anterolateral papillary muscle; LA, left atrium; LV, left ventricle; PMPM, posteromedial papillary muscle; RA, right atrium; RV, right ventricle.

(legend continued on next page)

involving more than two groups, a one-way ANOVA was performed with Tukey's multiple comparison test for post hoc analysis to estimate significance of differences from multiple comparisons. For heart rate assays, each arm represents 72 hpf larvae pooled from two to four technical replicates. For all data,  $p \leq 0.05$  was considered significant. Within graphs  $p$  values are indicated as follows: \* $p < 0.05$ , \*\* $p < 0.01$ , \*\*\* $p < 0.001$ , and \*\*\*\* $p < 0.0001$ .

## Results

### Clinical phenotypes of individuals with *STX4* variants

Patient 1 with a prior medical history significant for congenital sensorineural hearing loss, hypotonia, and global developmental delays initially presented with progressive fatigue, dyspnea, hypotension, and severe acidosis at 3 years of age (Figure 1A). Echocardiography showed DCM and severely depressed biventricular systolic function (Figure 1B); patient 1 developed frequent ectopy and ventricular tachycardia. Ultimately, his heart failure and arrhythmia were refractory to medical therapy, and he received an orthotopic heart transplant (OHT) within 2 months from the onset at his initial admission. Consistent with a diagnosis of DCM, post-OHT the explanted heart showed interstitial fibrosis, diminished myocardial cross-striations, loss of myofibrillar volume hypertrophic fibers, and marked variation in fiber size (Figures S1A and S1B). Patient 1's muscular weakness was progressive after OHT, although no other significant post-operative complications were observed. Skeletal muscle biopsy demonstrated myopathy with fibrosis (Figures S1C and S1D). A cochlear implant installed at age 6 has helped with communication and resulted in marked improvement over patient 1's previous hearing aids. Additional details of patient 1's clinical description are provided in "Supplemental note: Case Report for Patient 1."

Due to patient 1's clinical course, to rule out a known genetic etiology, normal chromosomal microarray, karyotype, Duchenne Muscular Dystrophy (DMD [MIM: 310200]) genetic sequencing, mitochondrial genome sequencing, and metabolic investigations, including amino acids, urine organic acids, and plasma acylcarnitine profiles were performed. As all these assays were negative, an SNP microarray was performed; this identified a 24.8-Mb region of homozygosity, DGV(GRCh 37:Feb.2009) (hg19): arr[hg19] 16p12.1q12.1(24,848,663-49,683,420)x2 Hmz. To refine whether a novel genetic lesion in this region was associated

with patient 1's phenotype, WES was performed. Exome trio analysis detected several variants, including a homozygous missense variant (c.718C > T; p.R240W) in exon 9 of the target-SNARE (t-SNARE) *STX4* locus (Table S1), which was confirmed with Sanger sequencing (Figure S2); the trio was of American-European (non-Finnish) descent. Among the detected variants, the *STX4* variant was the only candidate locus detected in the region of homozygosity found on the SNP array (Figure 1C). In addition, all other variants were either not concordant with patient 1's phenotype or zygosity, were predicted to be benign, or failed single-gene deletion/duplication testing by comparative genomic hybridization (Table S1). Notably, this variant is located within the coiled-coil SNARE homology domain of *STX4* that is highly conserved among vertebrates (Figure 1D) and was predicted to be damaging by *in silico* analyses (ACMG Criteria: PM2 PP3).<sup>36</sup>

A second individual (patient 2) was also identified via GeneMatcher.<sup>62</sup> Upon fetal ultrasound at 25+0 weeks of gestation, multiple anomalies were detected, including frontal edema, dilated ductus arteriosus, oligohydramnios, hypoplastic kidneys, dilated echogenic small bowel loops, duodenal atresia, and overlapping fingers. Prenatal trio-WES analysis of the fetus showed compound heterozygous *STX4* variants, consisting of two variants (Table S2): c.89\_90delGC; p.G30Dfs\*28 and c.232+4A > C. While the former variant is predicted to cause an early truncation, the latter variant occurred at a highly conserved position and is predicted to affect splicing using several *in silico* analyses, including SpliceAI (donor gain with score of 0.5),<sup>33</sup> MaxEntScan (likely disrupting: decreases splicing efficiency as predicted by a MaxEntScan score decrease of 47% [from 7.36 to 3.85]; likely effect: alternative splicing/insertion leading to a frameshift/3' exon extension),<sup>34</sup> CADD (deleterious with a score of 23.7),<sup>35</sup> and MutationTaster (disease causing)<sup>27</sup> (Figure 1C). This second trio was of European (non-Finnish) descent. No other pathogenic or likely pathogenic variants fitting patient 2's phenotype were detected (Table S2). Patient 2 was subsequently delivered at 30+4 weeks of pregnancy by secondary cesarean delivery due to complications of anhydramnios and subsequently died 5 days after birth due to multi-organ failure. Additional details of patient 2's clinical description are provided in Figure S3 and "Supplemental note: Case Report for Patient 2." Collectively, these clinical data suggest a requirement for *STX4* during normal human development and imply a role in cardiac physiology and neuromuscular function.

---

(C) Pedigree segregating the homozygous *STX4* c.718C > T; p.R240W variant in family 1 and the c.89\_90delGC; p.G30Dfs\*28 and c.232+4A > C alleles in family 2. *m*, variant allele; ?, unknown carrier; SAB, spontaneous abortion without further data.

(D) Alignment of portion of the *STX4* sequences containing the human variant. There is a high degree of conservation overall for *STX4* homologues. For instance, mouse *Stx4* and zebrafish *stx4* respectively share 95.3% and 75.3% amino acid conservation with human *STX4*. Dashed-magenta line indicates position of p.G30Dfs\*28 allele. Dashed-green line indicates the position of the p.R240W variant and expanded residue sequence indicates the conservation of this residue among the selected vertebrates. The residue positions indicate domain boundaries of the 297 amino acid human *STX4* protein.<sup>61</sup> Black highlights indicate amino acids that are conserved, gray highlights residues that are chemically similar (conservative), and white highlights display non-conservative variants. H<sub>abc</sub>, antiparallel three-helix bundle stabilization domain, H3<sub>abc</sub>, coiled-coil SNARE homology domain; NP, N-terminal peptide, TM, transmembrane.



### Zebrafish *stx4* mutants have pleiotropic defects analogous to the clinical presentation observed in human patients

Global *Stx4* knockout (KO) mice are early embryonic lethal, precluding analysis without conditional alleles.<sup>63</sup> In combination with the perinatal lethality of the biallelic variants of patient 2, this suggests that homozygous loss of *STX4* function is incompatible with survival in mammals; therefore, we examined the requirements for *stx4* in zebrafish, which often can overcome loss-of-function of genes essential for early development due to maternal deposition of RNA and protein, and can survive without a functional heart up to 5 days post fertilization (dpf).<sup>64</sup> IHC for *Stx4* showed restricted localization in the lateral mesoderm at the 8 somite stage (ss) (Figures S4A and S4A'), and the ventral vasculature, blood progenitors, and endoderm by the 18 s (Figures S4B and S4B'). From 24 to 48 hpf, *Stx4* progressively became enriched in the spinal cord, the axonal tracts, and heart (Figures S4C and S4C'). By 72 hpf, *Stx4* was expressed in neurons throughout the nervous system (Figures S4H and S4H').

To determine the requirements for *stx4* in zebrafish, we generated a *stx4* mutant zebrafish allele using CRISPR-Cas9. The allele identified and analyzed has a 38-bp deletion that eliminates the splice donor site of exon 3 (Figure 2A). Sequencing of RNA from the *stx4* mutants showed that the resulting allele produces three alternatively spliced transcripts due to the introduction of cryptic splice variants, which are all predicted to generate severely truncated proteins in the H<sub>abc</sub> stabilization domain (Figure 2B) similar to the earlier truncation observed due to allele 1 of patient 2 (Figure 1D).<sup>61</sup> Although overt defects like bradycardia and pericardial edema are already evident in a small proportion of *stx4* mutants at 48 hpf, by 72 hpf all *stx4* mutants exhibit a complex of defects, including myocardial dysfunction with linearized hearts, pericardial edema, bradycardia, microcephaly, loss of the midbrain/hindbrain boundary, otic vesicle dysgenesis, neuronal atrophy and cell death, and touch insensitivity (Figures 2C and S5A–S5H, Videos S1 and S2). Interestingly, a small proportion of the *stx4* mutants (estimated at <10%) have hearts that cease to beat entirely by 72 hpf. In addition, ~20% of *stx4* mutants exhibit hemorrhaging of the intersegmental and cranial vasculature (Figures S5I–S5M). IHC showed diminished expression of *Stx4* in the *stx4* mutants (Figures 3A–3D') and *stx4* mutants do not survive past 5 dpf (Figure S5N), presumably due to defects in multiple organs, further supporting that this allele results in loss of *Stx4*. Heterozygous carriers of the zebrafish *stx4* allele were equivalent to WT siblings, indicating the allele is recessive. Collectively, the pleiotropic defects found in *stx4* mutant zebrafish larvae appear to be reminiscent of the syndromic features observed in patient 1, particularly the cardiac dysfunction, sensorineural hearing loss, global developmental delay, and hypotonia, but also are also consistent with the perinatal lethality observed in patient 2.

### *stx4* mutant CMs have abrogated vesicle fusion

Given the cardiac abnormalities shared by the index patients and zebrafish *stx4* mutants, we next examined *Stx4* in the hearts of 72 hpf WT and *stx4* mutant larvae in greater detail. As a target-SNARE (t-SNARE), *Stx4* mediates vesicular fusion at the cell membrane. As might be expected for a t-SNARE,<sup>65,66</sup> we found that in CMs, *Stx4* predominantly localized in a punctate pattern in WTs, while its expression was significantly diminished in *stx4* mutants (Figures 3C and 3D'). We next assayed vesicle localization by IHC for *Vamp2*, the cognate vesicle-SNARE (v-SNARE) partner of *Stx4* (Figures 3E–3H). Whereas *stx4* mutant CMs have a similar number of vesicles as WT (Figures 3I and 3J), fewer vesicles appear “docked” (colocalized) to the CM sarcolemma, despite vesicle “clustering” similar to WT levels as measured by *Vamp2+* vesicle proximity to the sarcolemma (Figures 3G, 3H, 3K, and 3L). Collectively, these data support a requirement for *Stx4* in promoting vesicle fusion in CMs.

### *stx4* mutant hearts have marked bradycardia despite normal adrenergic function

As the hearts of 72 hpf zebrafish *stx4* mutant larvae are morphologically more linear than WT (Figures S6A–S6D), we assessed if this aberrant morphology reflects a difference in CM number. To quantify CMs, IHC for chamber-specific myosin heavy chains *Myh6* and *Myh7*, which respectively label atrial and ventricular CMs, was used with the *Tg(-5.1myl7:dsRed2-NLS)* transgene, which is expressed in all CM nuclei. However, no difference in overall or chamber-specific CM number was detected in the hearts of *stx4* mutant or WT zebrafish at 72 hpf (Figures S6C–S6G). Similarly, despite the marked bradycardia observed in the mutants (Figures 4A–4C, Videos S1 and S2), the amount of *Isl1+* pacemaker CMs<sup>67</sup> at the venous pole of the *stx4* mutant hearts appeared similar to WT (Figures S6H and S6I). A previous report suggested that zebrafish hearts are not yet innervated by 72 hpf.<sup>56</sup> Consistent with this, we failed to detect innervation to the hearts of 72 hpf WT (or *stx4* mutant) zebrafish using  $\alpha$ -Bungarotoxin (Figures S7A and S7B), acetylated  $\alpha$ -Tubulin (Figures S7C and S7D), or the vagus nerve reporter transgene *TgBAC(neurod:EGFP)* (Figure S7E). However, challenging *stx4* mutants with isoproterenol at 72 hpf indicated that they were just as competent to respond to adrenergic stimulation as WT clutch-mates (Figures S7F and S7G). Collectively, these data imply that adrenergic dysfunction does not account for the bradycardia observed in *stx4* mutants.

### *stx4* mutants exhibit Ca<sup>2+</sup> handling defects and increased sensitization to Ca<sup>2+</sup> modulation

As adrenergic function appeared to be preserved by 72 hpf, we explored Ca<sup>2+</sup> handling as a potential mechanism for the bradycardia using *Fura-2*, AM Ca<sup>2+</sup> imaging.<sup>55</sup> Imaging of 48 hpf explanted hearts extrinsically paced for comparison between *stx4* mutant hearts and WT clutch-mates did

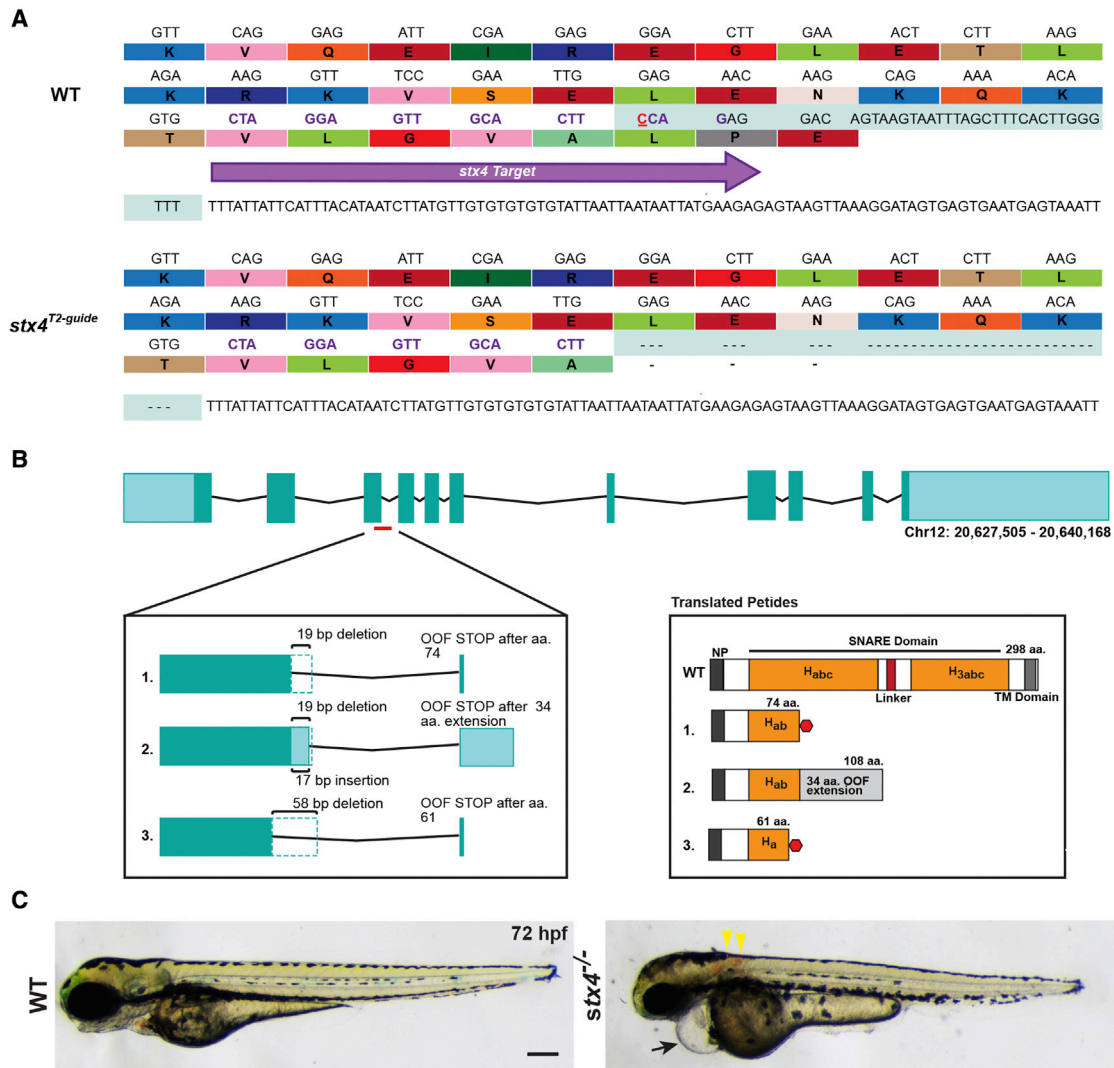

## Figure 2. Generation of *stx4* mutant zebrafish

(A) CRISPR-Cas9 was used to generate a zebrafish *stx4* loss-of-function allele that creates a 38-bp deletion (red underlined cytosine marks the endonuclease cut site), eliminating the splice donor site of exon 3 (protospacer denoted by purple arrow and codons; the last three codons at the splice junction are eliminated in *stx4* mutants).

(B) Schematic of transcripts showing the three alternative splice variants generated from this allele. All three transcripts are predicted to be out-of-frame (OOF; left) and to produce truncation products (translated peptides; right). H<sub>abc</sub>: antiparallel three-helix bundle stabilization domain; H<sub>3abc</sub>: coiled-coil SNARE homology domain; NP, N-terminal peptide, TM, transmembrane. Red polygon represents a stop codon in the 298 amino acid sized zebrafish *Stx4* protein, resulting in early truncation products.

(C) Bright field images of 72 hpf WT/*stx4*<sup>+/-</sup> sibling and *stx4* mutant larvae. Images of WT sibling embryos in all figures are *stx4*<sup>+/-</sup> sibling embryos. Black arrow indicates pericardial edema and linear heart. Yellow arrowheads indicate hemorrhages. *stx4* heterozygotes are overtly indistinguishable from WT. Scale bar, 200  $\mu$ m.

not reveal any significant differences, consistent with the limited penetrance of pericardial edema and bradycardia at this stage. However, Ca<sup>2+</sup> imaging at 72 hpf indicated that the Ca<sup>2+</sup>-transient amplitude in *stx4* mutant atria was significantly diminished compared with WTs (Figures 4D–4G). In addition, the Ca<sup>2+</sup>-transient duration in paced 72 hpf *stx4* mutant ventricles was significantly shorter than in WTs (Figures 4H and 4I). Thus, the cardiac dysfunction observed in *stx4* mutants is at least partially due to defects in Ca<sup>2+</sup> handling in CMs.

To further characterize the Ca<sup>2+</sup> handling abnormalities in *stx4* mutants, we exploited pharmacological manipula-

tion of both sarcolemmal Ca<sup>2+</sup> uptake and Ca<sup>2+</sup>-induced-Ca<sup>2+</sup> release from the sarcoplasmic reticulum of CMs. We challenged 72 hpf larvae with pharmacological modulators of Ca<sup>2+</sup> handling and assayed heart rates only of *stx4* mutants with observable heart rates for this analysis. Consistent with the ability of Syntaxins to regulate LTCCs in other tissues,<sup>68</sup> *stx4* mutants treated with nifedipine, a selective LTCC blocker, were sensitized in a dose-dependent manner and exhibited asystole at concentrations below the threshold for bradycardia in WT clutch-mates (Figure 5A).<sup>55</sup> Conversely, Bay K-8644, an LTCC agonist,<sup>55</sup> was able to partially rescue the bradycardia phenotype, as



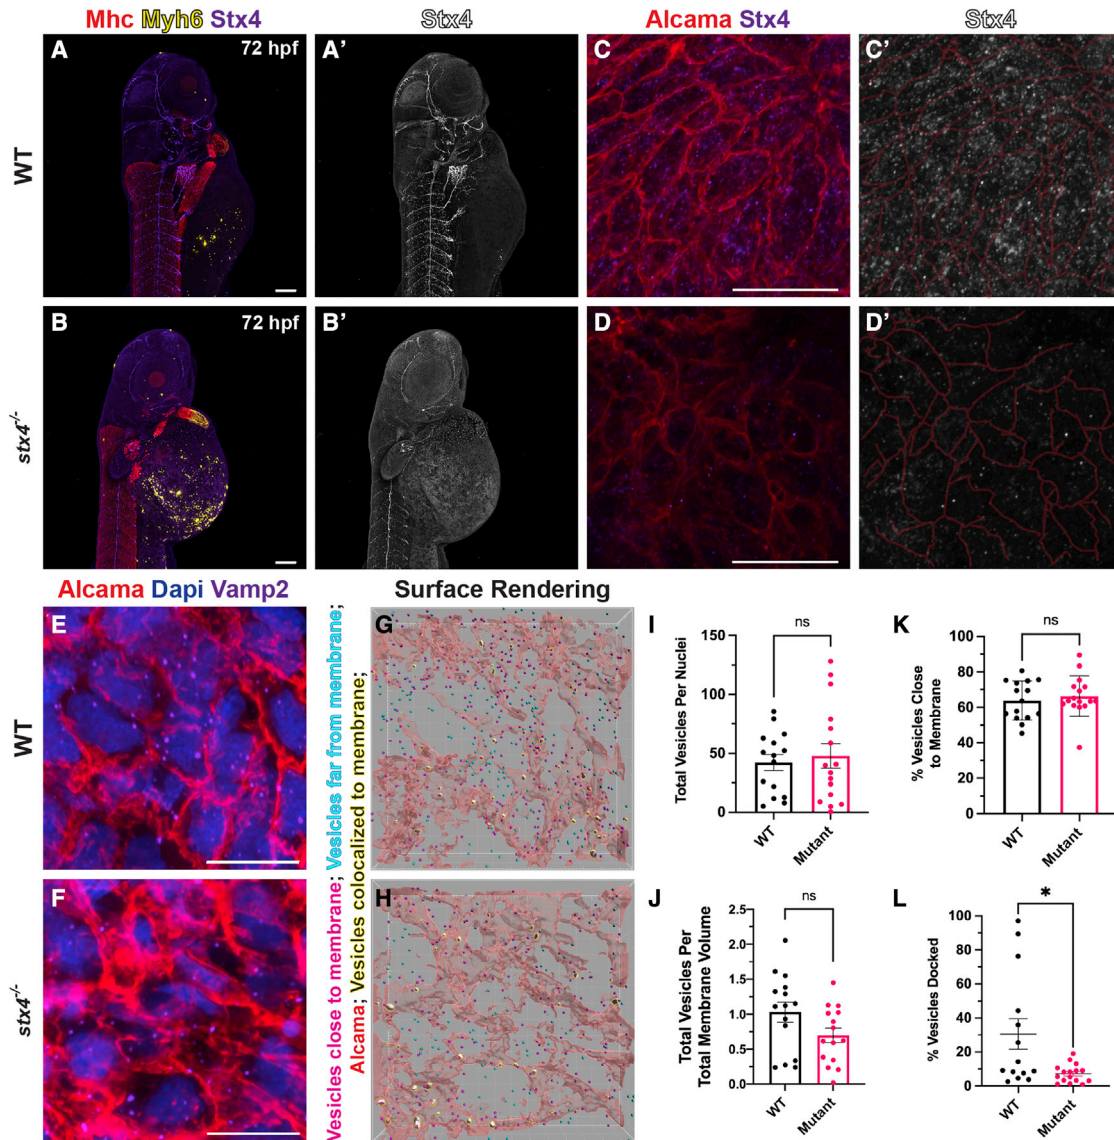

the *stx4* mutant treated group mean heart rate is restored to ~90% of untreated WTs, though still statistically different from the untreated WT embryos (Figure 5B). We also challenged larvae with a cocktail of thapsigargin

and caffeine (TgC), which blocks the sarco/ER Ca<sup>2+</sup>-ATPase (SERCA) or stimulates Ryanodine receptors, respectively, thereby depleting sarcoplasmic Ca<sup>2+</sup> stores.<sup>55</sup> TgC produced marked bradycardia in both WT larvae and

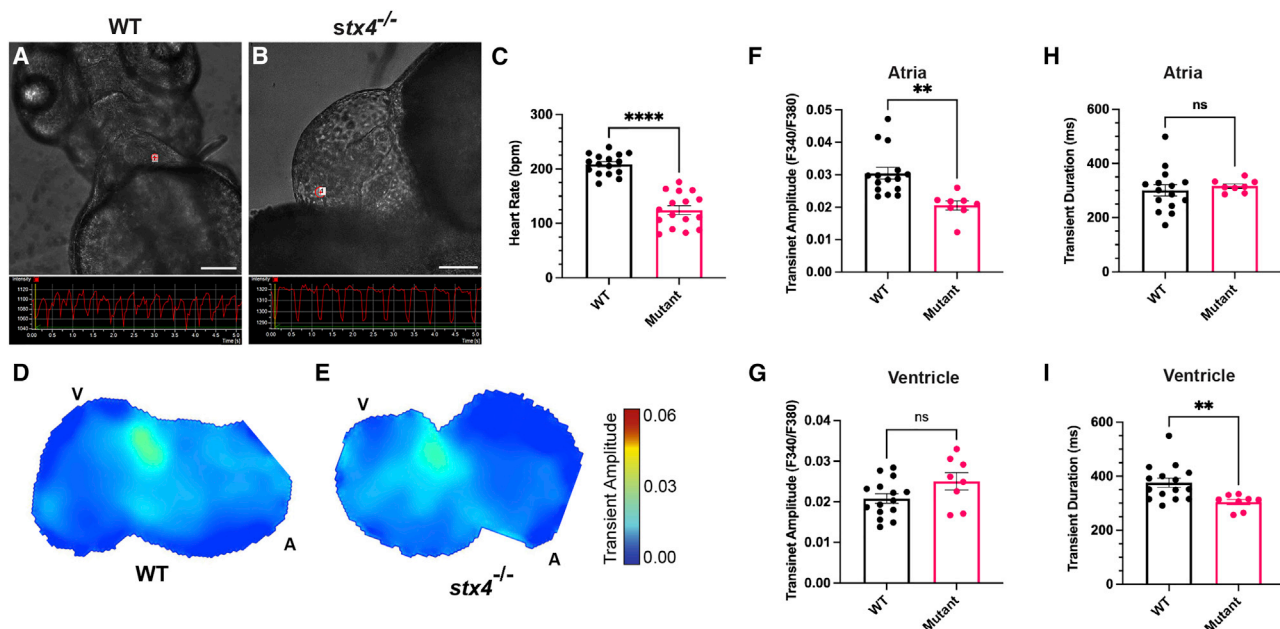

**Figure 4. *Stx4* regulates  $\text{Ca}^{2+}$  handling in CMs**

(A and B) Screenshots from high-speed images of 72 hpf WT and *stx4* mutant larvae showing a ventricular region of interest (ROI) and the resulting kymograph used to quantify heart rates. Scale bars, 100  $\mu\text{M}$ .

(C) Heart rates (HR) determined from ventricular ROIs of 72 hpf WT and *stx4* mutant larvae captured by high-speed imaging and quantified as beats per minute (bpm). Mutants exhibit an  $\sim 40\%$  reduction in HR versus WT (WT mean HR: 208.4 bpm, Mutant mean HR: 124.3 bpm). Data are represented as the mean  $\pm$  SEM,  $n = 16$  larvae/group, Student's *t* test, \*\*\*\* $p < 0.0001$ .

(D and E) Maps of  $\text{Ca}^{2+}$  transient amplitudes from paced hearts of 72 hpf WT or *stx4* mutant larvae. A, atrium; V, ventricle. The color scale depicts  $\text{Ca}^{2+}$  transient amplitudes in fluorescence ratio units (F340/F380).

(F and G)  $\text{Ca}^{2+}$  transient amplitudes from atrial or ventricular ROIs, respectively.

(H and I)  $\text{Ca}^{2+}$  transient durations from atrial and ventricular ROIs. Data are represented as the mean  $\pm$  SEM,  $n = 14$  WT/*stx4*<sup>+/-</sup> and  $n = 8$  *stx4*<sup>-/-</sup>, Student's *t* test, \*\* $p < 0.01$ .

the majority of the *stx4* mutant larvae (a 72.4% reduction in heart rate in WT versus a 76.8% reduction in *stx4* mutants versus controls; Figure 5C), suggesting that baseline SERCA activity is a less likely contributor to the basal bradycardia. We also challenged *stx4* mutants with NNC 55-0396 (NNC), a selective T-type  $\text{Ca}^{2+}$  channel (TTCC) antagonist.<sup>69</sup> However, two different concentrations of NNC, including one previously reported to abolish the cardiac action potential in larval zebrafish,<sup>69</sup> were not sufficient to significantly affect the heart rate of WT or *stx4* mutant larvae at 72 hpf (Figure 5D), consistent with previous reports regarding the contribution of LTCCs (and to a lesser extent SERCA) to intrinsic cardiac pacing in zebrafish and other vertebrates.<sup>70</sup> Together, these data imply that *stx4* mutants have reduced sarcolemmal LTCC function, and strongly support this mechanism as a substantive contributor to the cardiac dysfunction observed in the setting of *Stx4* loss-of-function.

### The analogous zebrafish *Stx4*<sup>R241W</sup> allele is functionally hypomorphic

Given the discordance between the predominantly cardiac manifestations emerging in the third year of life observed with the homozygous *STX4*<sup>R240W</sup> variant of patient 1 and the perinatal lethality of patient 2 (with the premature truncation variant in trans with a splice variant resulting in a

donor gain in intron 3), we next investigated whether features of the pleiotropic *stx4* mutant syndrome might be rescued and whether patient 1's *STX4*<sup>R240W</sup> variant functions as a hypomorphic allele. Thus, we generated stable transgenic lines ubiquitously expressing WT zebrafish *Stx4*, or *Stx4* with a R241W variant, which is the analogous point-mutation in zebrafish to that observed in patient 1 (Figure 6A). Importantly, hemizygous expression of either transgene in WT or *stx4* heterozygous larvae does not cause gain-of-function or dominant negative phenotypes (Figures 6B and 6D). Hemizygous expression of the *actb2:stx4-IRES-EGFP* transgene was sufficient to rescue the pleiotropic *stx4* mutant defects (Figures 6B and 6C), including the bradycardia (Figure 6F). However, hemizygous expression of the *actb2:stx4*<sup>R241W</sup>-*IRES-EGFP* transgene was not able to rescue the mutants (Figures 6D and 6E), despite being expressed approximately at the levels of one WT *stx4* allele (Figure S8). In contrast to heterozygous *stx4* larvae and *stx4* mutant larvae hemizygous for the *actb2:stx4-IRES-EGFP* transgene, *stx4* mutant larvae hemizygous for the *actb2:stx4*<sup>R241W</sup>-*IRES-EGFP* transgene showed a high degree of variability in their bradycardia (Figure 6G), which suggested that the variant likely produces a hypomorphic protein, consistent with patient 1's survival into childhood and the progressive onset of their syndrome. Finally, we treated *stx4* mutants bearing hemizygous

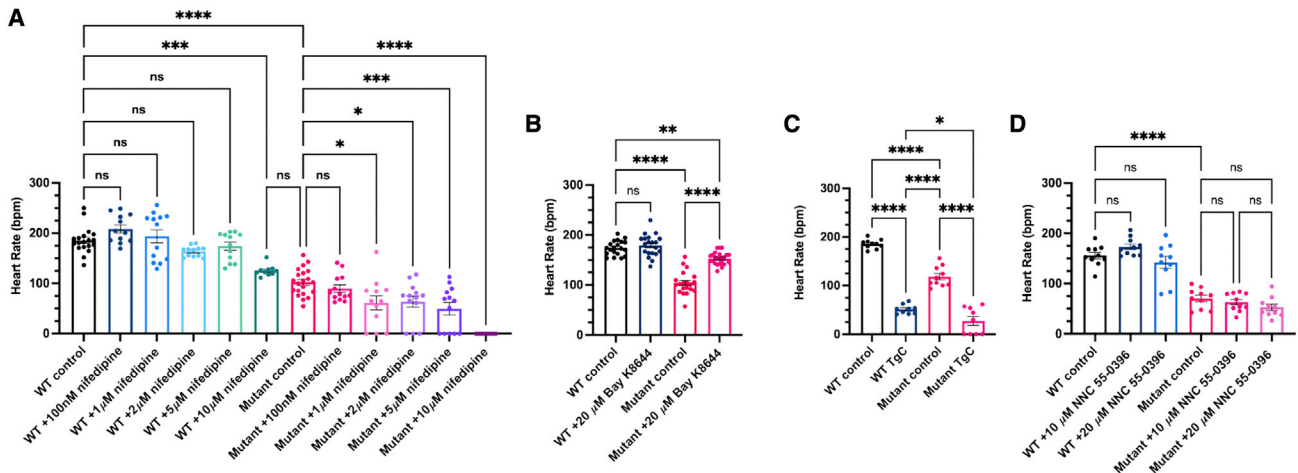

**Figure 5. *Stx4* regulates L-type voltage gated  $\text{Ca}^{2+}$  channel activity**

(A) Heart rates (HRs) determined from ventricular regions of interest of 72 hpf WT and *stx4* mutant larvae following a dose-response treatment with 1% DMSO/embryo water (control), 100 nM nifedipine, 1  $\mu\text{M}$  nifedipine, 2  $\mu\text{M}$  nifedipine, 5  $\mu\text{M}$  nifedipine, or 10  $\mu\text{M}$  nifedipine for 45 min. Data are represented as the mean  $\pm$  SEM,  $n = 10\text{--}21$  larvae/group, one-way ANOVA, \* $p < 0.05$ , \*\*\* $p < 0.001$ , \*\*\*\* $p < 0.0001$ .

(B) HRs determined from 72 hpf WT and *stx4* mutant larvae treated with either 1% DMSO/embryo water (control) or 20  $\mu\text{M}$  Bay K-8644. Control *stx4* mutants exhibit an  $\sim 40\%$  reduction in mean HR versus WT (WT control mean HR: 174.2 bpm, *stx4* mutant control mean HR: 104.1 bpm). By contrast, *stx4* mutants treated with 20  $\mu\text{M}$  Bay K-8644 (mean HR: 153.1 bpm) are rescued to  $\sim 90\%$  of the WT control HR and  $\sim 150\%$  of the untreated *stx4* mutant HR, while HR of WT treated with 20  $\mu\text{M}$  Bay K-8644 are similar to untreated WT controls (mean HR: 179.3 bpm). Data are represented as the mean  $\pm$  SEM,  $n = 20\text{--}34$  larvae/group, one-way ANOVA, \*\* $p < 0.01$ , \*\*\*\* $p < 0.0001$ .

(C) HRs determined from WT and *stx4* mutant larvae treated with either 1% DMSO/embryo water (control) or a mixture of 10  $\mu\text{M}$  thapsigargin and 10 mM caffeine (TgC). Data are represented as the mean  $\pm$  SEM,  $n = 9\text{--}10$  larvae/group, one-way ANOVA, \* $p < 0.05$ , \*\*\*\* $p < 0.0001$ .

(D) HRs determined from a dose-response of WT and *stx4* mutant larvae treated with either 1% DMSO/embryo water (control), 10  $\mu\text{M}$  NNC 55-0396, or 20  $\mu\text{M}$  NNC 55-0396. Data are represented as the mean  $\pm$  SEM,  $n = 10$  larvae/group, one-way ANOVA, \*\*\*\* $p < 0.0001$ .

expression of *actb2:stx4<sup>R241W</sup>-IRES-EGFP* with Bay K-8644 to ascertain whether this allele might be responsive to modulation of LTCC function. Remarkably, treatment with Bay K-8644 was able to fully rescue the bradycardia of *stx4* mutant larvae with hemizygous expression of the *actb2:stx4<sup>R241W</sup>-IRES-EGFP*, as their heart rates were indistinguishable from WT (Figure 6H). Therefore, together these data support that the variant is hypomorphic and present the possibility that an LTCC agonist may therapeutically rescue some aspects of the dysfunction due to the R240W allele.

## Discussion

In the present study, we report an index patient (patient 1) with a complex syndrome consisting of global developmental delays, sensorineural hearing loss, hypotonia, frequent ectopy, and biventricular DCM that were refractory to treatment and necessitated heart transplant. WES revealed a homozygous, non-conservative missense variant in *STX4* that was predicted by Polyphen-2 and SIFT to be probably damaging and deleterious, respectively.<sup>30,71</sup> Although three heterozygous alleles of the same residue detected in patient 1 are readily identifiable in the gnomAD database (single nucleotide variants: 16-31050877-C-T [GRCh37] and 16-31039556-C-T [GRCh38], gnomAD

v.2.1.1 and v.3.1.2, respectively),<sup>72</sup> no additional homozygous variants are available, which is unsurprising, given that this allele is rare with a global MAF of 0.00000795. Recently, an association between Silver-Russell syndrome (SRS [MIM: 180860]) and other SNVs in *STX4* has also been suggested<sup>73</sup>; however, we did not detect SRS features in patient 1, such as characteristic facies, nor analogous features in *stx4* mutant zebrafish, aside from a general failure to thrive. Thus, to the best of our knowledge, we are reporting the first direct association of *STX4* in human disease and an SNARE protein affecting cardiac function *in vivo*.

To date, there has been limited understanding of the mechanism by which *STX4* proteins might affect cardiac function. Although *Stx4* has been proposed to affect release of atrial natriuretic factor in cultured CMs,<sup>74,75</sup> this role is unlikely to account for patient 1's cardiac defects, given their complex physiology.<sup>76</sup> In addition to the aforementioned early embryonic lethality of *Stx4* global-KO mice, which is reminiscent of the compound heterozygous truncating allele that we identified in patient 2 (perinatally lethal, with even more severe, pleiotropic abnormalities), heterozygous *Stx4* mice merely exhibit impaired glucose tolerance due to reduced Glut4 translocation in skeletal muscle.<sup>63</sup> While this is consistent with *STX4*'s role in GLUT4 trafficking in adipocytes,<sup>77-79</sup> similar to heterozygous *stx4* mutant zebrafish, these mice display no other overt defects.<sup>63</sup> Additionally, a recent study that



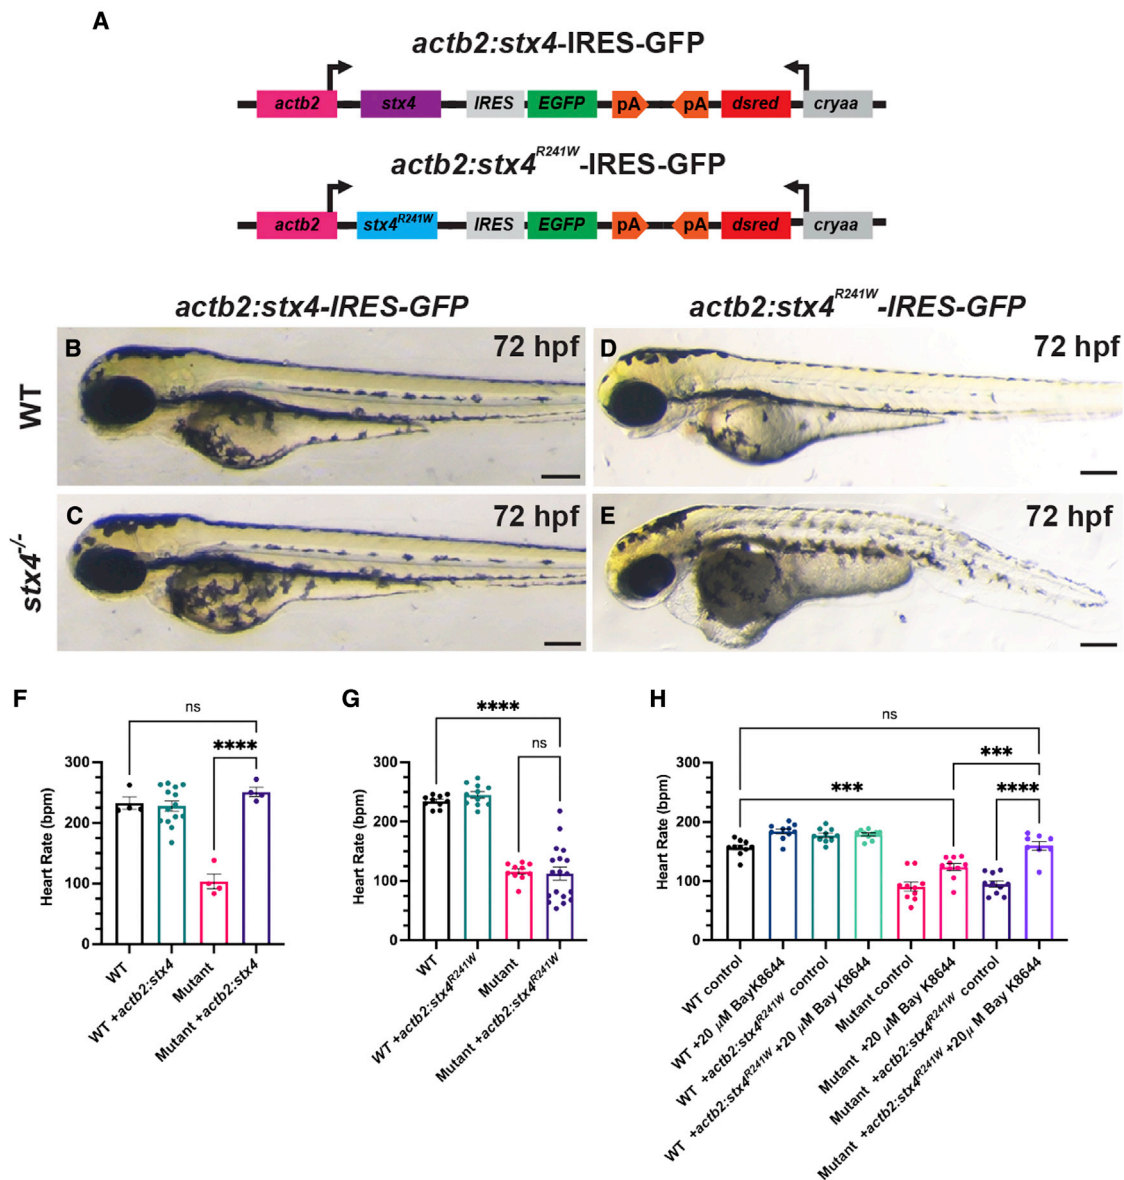

**Figure 6. The zebrafish *Stx4<sup>R241W</sup>* variant is hypomorphic**

(A) Schematic of constructs used to generate transgenic zebrafish expressing WT *Stx4* (*actb2:stx4-IRES-GFP*) and the zebrafish *Stx4<sup>R241W</sup>* variant (*actb2:stx4<sup>R241W</sup>-IRES-GFP*), which is equivalent to the patient 1 *STX4<sup>R240W</sup>* variant.

(B–E) Images of 72 hpf WT and *stx4* mutants hemizygous for the *actb2:stx4-IRES-GFP* and *actb2:stx4<sup>R241W</sup>-IRES-GFP* transgenes. Scale bar, 200 μM.

(F and G) Heart rates determined from ventricular regions of interest of 72 hpf WT and *stx4* mutant larvae lacking and hemizygous for *actb2:stx4-IRES-GFP* or *actb2:stx4<sup>R241W</sup>-IRES-GFP*. Data are represented as the mean ± SEM, n = (F) 4–14 and (G) 10–18 larvae/group, respectively, one-way ANOVA, \*\*\*\*p < 0.0001.

(H) Heart rates from ventricular ROIs determined from 72 hpf WT and *stx4* mutant larvae lacking and hemizygous for *actb2:stx4<sup>R241W</sup>-IRES-GFP* treated with either 1% DMSO/embryo water (control) or 20 μM Bay K-8644. Data are represented as the mean ± SEM, n = 8–10 larvae/group, one-way ANOVA, \*\*\*p < 0.001, \*\*\*\*p < 0.0001.

aimed to uncover the role of SNAREs in cardiac insulin resistance and Glut4 trafficking failed to detect differential expression of *Stx4* between control, C57BL/KsJ-*lepr<sup>db</sup>/lepr<sup>db</sup>*, or high-fat diet fed mice.<sup>80</sup> Conditional *Stx4* KO mice have also been used to investigate *Stx4*'s requirement in bone matrix deposition.<sup>81,82</sup> Despite these proposed roles for *STX4*, patient 1 did not exhibit metabolic or bone mineralization defects, the former of which is another common feature of SRS.

Because cardiac dysfunction was the major feature of patient 1's acute presentation and because reduced-LV function was also identified perinatally in patient 2, indicating that progressive loss of *STX4* function may present along a spectrum manifesting in cardiac dysfunction, we aimed to understand the requirement for *Stx4* in the heart. While decreased cardiac function has been associated as a potential morbidity in synaptopathies, including Otahara and West Syndrome,<sup>83,84</sup> the regulation of proper cardiac

function by SNARE proteins had not been previously established *in vivo*. Importantly, in both of these reports, one a clinical case report<sup>83</sup> and the other a zebrafish model study,<sup>84</sup> the effects on cardiac function were secondary due to neuronal input. *In vitro*, studies conducted in HEK 293 cells and *Xenopus laevis* oocytes have suggested that SNARE proteins play a role in regulating ion channel vesicle fusion as well as can exhibit independent allosteric interactions with ion channels to modulate sensitivity or gating behavior.<sup>18-23</sup> For instance, Syntaxin 1A is reported to modulate different steps of the exocytosis and gating of several cardiac ion channels, including Ca<sub>v</sub> (L-, N-, and T-type), K<sub>v</sub> (K<sub>v</sub>2.1, K<sub>v</sub>4.2, K<sub>v</sub>4.3, K<sub>v</sub>7.1, and K<sub>v</sub>11.1), and K<sub>ATP</sub> (K<sub>ir</sub>6.2), by direct interaction.<sup>17-23</sup> Notably, although some of these proteins are implicated as causes of cardiac channelopathies,<sup>19,85,86</sup> many have extracardiac functions. While these previous studies suggested that SNARE proteins may play a role in normal cardiac function, we investigated potential mechanistic links between the variants and the relevant cardiac outcomes. In contrast to previous *Stx4* loss-of-function models, *stx4* mutant zebrafish develop overt pleiotropic abnormalities that are analogous to both of the patients (a cardiac syndrome and early developmental lethality by 5 dpf, respectively), suggesting a highly conserved requirement for STX4 during vertebrate development. Notably, the syndromic phenotype becomes fully penetrant by 72 hpf in zebrafish *stx4* mutant larvae, indicating that maternal *stx4* mRNA likely accounts for a delay in the onset of the syndrome.<sup>87</sup> The expression of *Stx4* in neural tissues and the heart is consistent with the conservation of the predominantly neuromuscular/neuro-sensory and cardiac syndrome of the zebrafish *stx4* mutants and both index patients.

In addition to modeling features of both identified patients, loss of *Stx4* leads to severe bradycardia in zebrafish larvae, at least partially due to aberrations in Ca<sup>2+</sup> handling that are directly attributable to reduced LTCC activity. These results indicate at least a functional interaction between *Stx4* and LTCCs within CMs. Evidence for this is bolstered by our finding that vesicle docking is significantly reduced in CMs of *stx4* mutants, concomitant with Ca<sup>2+</sup> handling defects. Notably, it has been reported that approximately 80% of early CM Ca<sup>2+</sup> in zebrafish is mediated by Ca<sup>2+</sup> influx via LTCCs,<sup>70</sup> which are known to play a crucial role in zebrafish heart development and human disease.<sup>88</sup> We also observed a significant decrease in the ventricular Ca<sup>2+</sup> transient duration of *stx4* mutants. The changes in Ca<sup>2+</sup> transient amplitude and duration that we observed imply substantial reduction in total Ca<sup>2+</sup> flux in each cardiac cycle, which would be predicted to affect not only pacemaker CM rates but also atrial and ventricular CM contractility, as observed in the clinic. These data also support the possibility that STX4 functionally interacts and affects LTCCs in a conserved fashion among vertebrates. Interestingly, a recent report has implicated an association between *CACNA1C* and neurodevelopmental abnormalities and epilepsy (including West

Syndrome), suggesting a possible common axis of interaction between SNAREs and LTCCs, given the parity of the syndromic features observed from both protein classes.<sup>89</sup>

Despite the effects on Ca<sup>2+</sup> handling in the *stx4* zebrafish mutants, we presently cannot rule out that aspects of the cardiac phenotype and dysfunction are non-cell autonomous. For example, pericardial edema, a common defect observed in zebrafish mutants with cardiovascular dysfunction, may contribute to the morphologically linearized hearts in the *stx4* mutants. In addition, a cardiac-specific *myl7:stx4-IRES-EGFP* transgenic line that we created failed to rescue the overt cardiac defects in the *stx4* mutants (data not shown). Although one interpretation of this result is that it supports there may be non-autonomous effects contributing to the cardiac defects observed in the *stx4* mutants, there are caveats to using this transgenic CM-specific rescue approach and line, such as whether the timing and levels of transgenic *stx4* expression reflect endogenous *stx4* within CMs. Unfortunately, we could not determine if there was rescue of Ca<sup>2+</sup> transients, despite the lack of morphological rescue, as the spectral emission of EGFP and Fura-2,AM overlap. Thus, the variables involved with this experiment prevent us from definitively concluding there are non-autonomous cardiac defects from *stx4* loss. Nevertheless, the *stx4* zebrafish mutants also have defects in endothelial integrity, as indicated by hemorrhages, suggesting vascular defects as a possibility that could non-autonomously contribute to the cardiac dysfunction. However, while negative modulation of LTCC activity may reflexively increase heart rate due to vasodilation of the coronary arteries and peripheral vasculature in humans,<sup>90</sup> zebrafish lack coronary vasculature until ~7 weeks post fertilization.<sup>91</sup> In addition, *stx4* mutants exhibit asystole upon treatment with nifedipine, suggesting that the effect of LTCC modulation is predominantly chronotropic and acts specifically in the heart. Therefore, our data are consistent with at least the cardiac Ca<sup>2+</sup> handling defects observed in *stx4* mutants being cell autonomous within CMs; however, further analysis is needed to discern if there are additional cell non-autonomous influences of *Stx4* on the heart.

Our data also support that patient 1's STX4<sup>R240W</sup> variant functions as a hypomorph, given that ubiquitous expression of zebrafish *Stx4*<sup>R241W</sup> is not sufficient to rescue the syndromic phenotype of *stx4* mutant zebrafish. However, treatment with Bay K-8644 is sufficient to rescue the bradycardia of *stx4* mutants hemizygous for the *actb2:stx4*<sup>R241W-IRES-EGFP</sup> transgene to rates indistinguishable from WTs, while *stx4* homozygous mutants treated with Bay K-8644 is only sufficient to restore their heart rate to ~90% of WTs, supporting some functionality of the variant. Collectively these data suggest that arrhythmias due to loss or partial abrogation of *STX4* function may be ameliorated by modulation of Ca<sup>2+</sup> levels in CMs. While the heterozygous *stx4* larvae do not have overt defects, a caveat of the current analysis using the hemizygous *actb2:stx4*<sup>R241W-IRES-EGFP</sup> transgenic line is that it may be expressed at slightly lower

levels than predicted for one endogenous WT allele of *stx4* (Figure S8), suggesting that higher levels of this variant may confer greater compensatory functionality in the absence of WT *stx4* alleles. It should also be noted that variants in other genes that stabilize or traffic ion channels, such as *Ankrin-B* (*ANK2* [MIM: 106410]) and *Caveolin-3* (*CAV3* [MIM: 601253]) have been implicated in channelopathies,<sup>92-96</sup> indicating that monogenic lesions, such as the one observed in patient 1, might plausibly be linked to arrhythmogenic disorders. This is notable as congenital heart diseases (CHDs), which are the most common birth defects and account for nearly one-third of all major congenital anomalies,<sup>97,98</sup> often lead to arrhythmia by adulthood.<sup>99-102</sup> As such disorders often present as sudden cardiac arrest and are typically lethal, the collective impact of congenital arrhythmogenic disorders (CADs) is significant.<sup>103,104</sup> While further study of the role of *Stx4* in the heart may provide additional mechanistic information, our data modeling previously unreported human disease variants using zebrafish demonstrate a conserved requirement for SNARE proteins in vertebrate heart development, and highlight new potential avenues targeting SNARE proteins in the treatment of CHD and CADs.

#### Data and code availability

This study did not generate/analyze [datasets/code].

#### Supplemental information

Supplemental information can be found online at <https://doi.org/10.1016/j.xhgg.2022.100115>.

#### Acknowledgments

We thank Terri L. VanDyke for technical assistance. We thank the Cincinnati Children's Confocal Imaging Core for their assistance with imaging and data interpretation. We thank the Cincinnati Children's Division of Pathology for their assistance in the processing and scanning of human tissue samples. This work was supported by funding from the National Institutes of Health (R01 HL137766, R01 HL141186, and R01 HL154522 to J.S.W.; T32 HL125204 and T32 GM063483 to E.P.; R24 OD017870 to C.A.M.; K08 HL143177-01A1 to K.N.W.), the Leducq Foundation (to C.A.M.), the American Heart Association (predoctoral fellowship 829174 to E.P.), and the Albert J. Ryan Foundation (to E.P.).

#### Declaration of interests

The authors declare no competing interests.

Received: January 6, 2022

Accepted: April 22, 2022

#### Web resources

The following web-based resources were used:

Burrows-Wheeler Aligner. <http://bio-bwa.sourceforge.net>.  
CADD. <https://cadd.gs.washington.edu/>

ChopChop. <http://chopchop.cbu.uib.no>.  
Developmental Studies Hybridoma Bank. <https://dshb.biology.uiowa.edu>.  
Ensembl. <http://useast.ensembl.org/index.html>.  
Fathmm. <http://fathmm.biocompute.org.uk>.  
GeneMatcher. <https://genematcher.org>  
gnomAD/ExAC. <https://gnomad.broadinstitute.org>.  
ImageJ. <https://imagej.nih.gov/ij/download.html>.  
Imaris Open. <https://imaris.oxinst.com/open>.  
MaxEntScan. [http://hollywood.mit.edu/burgelab/maxent/Xmaxentscan\\_scoreseq.html](http://hollywood.mit.edu/burgelab/maxent/Xmaxentscan_scoreseq.html).  
MutationAssessor. <http://mutationassessor.org/r3>.  
MutationTaster. [www.mutationtaster.org](http://www.mutationtaster.org).  
Online Mendelian Inheritance in Man. <http://www.omim.org>.  
PolyPhen-2. <http://genetics.bwh.harvard.edu/pph2>.  
PROVEAN. <http://provean.jcvi.org/index.php>.  
SIFT. <https://sift.bii.a-star.edu.sg>.  
Skewer. <https://sourceforge.net/projects/skewer>.  
Varsome. <https://varsome.com>.  
The Zebrafish Information Network. <https://zfin.org>.

#### References

- Rizo, J., and Xu, J. (2015). The synaptic vesicle release machinery. *Annu. Rev. Biophys.* 44, 339–367.
- Salpietro, V., Lin, W., Delle Vedove, A., Storbeck, M., Liu, Y., Efthymiou, S., Manole, A., Wiethoff, S., Ye, Q., Saggat, A., et al. (2017). Homozygous mutations in *VAMP1* cause a presynaptic congenital myasthenic syndrome. *Ann. Neurol.* 81, 597–603.
- Verhage, M., and Sørensen, J.B. (2020). SNAREopathies: diversity in mechanisms and symptoms. *Neuron* 107, 22–37.
- Salpietro, V., Malintan, N.T., Llano-Rivas, I., Spaeth, C.G., Efthymiou, S., Striano, P., Vandrovcova, J., Cutrupi, M.C., Chimenz, R., David, E., et al. (2019). Mutations in the neuronal vesicular SNARE *VAMP2* affect synaptic membrane fusion and impair human neurodevelopment. *Am. J. Hum. Genet.* 104, 721–730.
- Fukuda, H., Imagawa, E., Hamanaka, K., Fujita, A., Mitsuhashi, S., Miyatake, S., Mizuguchi, T., Takata, A., Miyake, N., Kramer, U., et al. (2018). A novel missense *SNAP25b* mutation in two affected siblings from an Israeli family showing seizures and cerebellar ataxia. *J. Hum. Genet.* 63, 673–676.
- Torres, V.I., Vallejo, D., and Inestrosa, N.C. (2017). Emerging synaptic molecules as candidates in the etiology of neurological disorders. *Neural Plast.* 2017, 1–25.
- Devaux, J., Dhifallah, S., De Maria, M., Stuart-Lopez, G., Becq, H., Milh, M., Molinari, F., and Aniksztejn, L. (2017). A possible link between *KCNQ2*- and *STXBP1*-related encephalopathies: *STXBP1* reduces the inhibitory impact of syntaxin-1A on M current. *Epilepsia* 58, 2073–2084.
- Saito, H., Kato, M., Mizuguchi, T., Hamada, K., Osaka, H., Tohyama, J., Urano, K., Kumada, S., Nishiyama, K., Nishimura, A., et al. (2008). De novo mutations in the gene encoding *STXBP1* (*MUNC18-1*) cause early infantile epileptic encephalopathy. *Nat. Genet.* 40, 782–788.
- Hamada, N., Iwamoto, I., Tabata, H., and Nagata, K.-I. (2017). *MUNC18-1* gene abnormalities are involved in neurodevelopmental disorders through defective cortical architecture during brain development. *Acta Neuropathol. Commun.* 5, 92.



10. Ma, H., Feng, S., Deng, X., Wang, L., Zeng, S., Wang, C., Ma, X., Sun, H., Chen, R., Du, S., et al. (2018). A PRRT2 variant in a Chinese family with paroxysmal kinesigenic dyskinesia and benign familial infantile seizures results in loss of interaction with STX1B. *Epilepsia* *59*, 1621–1630.
11. Klöckner, C., Sticht, H., Zacher, P., Popp, B., Babcock, H.E., Bakker, D.P., Barwick, K., Bonfert, M.V., Bönnemann, C.G., Brilstra, E.H., et al. (2021). De novo variants in SNAP25 cause an early-onset developmental and epileptic encephalopathy. *Genet. Med.* *23*, 653–660.
12. Rohena, L., Neidich, J., Truitt Cho, M., Gonzalez, K.D., Tang, S., Devinsky, O., and Chung, W.K. (2013). Mutation in SNAP25 as a novel genetic cause of epilepsy and intellectual disability. *Rare Dis.* *1*, e26314.
13. Heyne, H.O., Singh, T., Stamberger, H., Abou Jamra, R., Cagluyan, H., Craiu, D., De Jonghe, P., Guerrini, R., Helbig, K.L., Koeleman, B.P.C., et al. (2018). De novo variants in neurodevelopmental disorders with epilepsy. *Nat. Genet.* *50*, 1048–1053.
14. Südhof, T.C., and Rothman, J.E. (2009). Membrane fusion: grappling with SNARE and SM proteins. *Science* *323*, 474–477.
15. Saffitz, J.E. (2015). Protein trafficking in cardiovascular disease: how the science has evolved and where it must go. *Trends Cardiovasc. Med.* *25*, 390–391.
16. Xiao, S., and Shaw, R.M. (2015). Cardiomyocyte protein trafficking: relevance to heart disease and opportunities for therapeutic intervention. *Trends Cardiovasc. Med.* *25*, 379–389.
17. Atlas, D. (2014). Voltage-gated calcium channels function as Ca<sup>2+</sup>-activated signaling receptors. *Trends Biochem. Sci.* *39*, 45–52.
18. He, Y., Kang, Y., Leung, Y.-M., Xia, F., Gao, X., Xie, H., Gaisano, H.Y., and Tsushima, R.G. (2006). Modulation of Kv2.1 channel gating and TEA sensitivity by distinct domains of SNAP-25. *Biochem. J.* *396*, 363–369.
19. Chao, C.C.T., Mihic, A., Tsushima, R.G., and Gaisano, H.Y. (2011). SNARE protein regulation of cardiac potassium channels and atrial natriuretic factor secretion. *J. Mol. Cell. Cardiol.* *50*, 401–407.
20. Ng, B., Kang, Y., Xie, H., Sun, H., and Gaisano, H.Y. (2008). Syntaxin-1A inhibition of P-1075, cromakalim, and diazoxide actions on mouse cardiac ATP-sensitive potassium channel. *Cardiovasc. Res.* *80*, 365–374.
21. Pasyk, E.A., Kang, Y., Huang, X., Cui, N., Sheu, L., and Gaisano, H.Y. (2004). Syntaxin-1A binds the nucleotide-binding folds of sulphonylurea receptor 1 to regulate the KATPChannel. *J. Biol. Chem.* *279*, 4234–4240.
22. Wu, J., Cui, N., Piao, H., Wang, Y., Xu, H., Mao, J., and Jiang, C. (2002). Allosteric modulation of the mouse Kir6.2 channel by intracellular H<sup>+</sup> and ATP. *J. Physiol.* *543*, 495–504.
23. Yamakawa, T., Saith, S., Li, Y., Gao, X., Gaisano, H.Y., and Tsushima, R.G. (2007). Interaction of syntaxin 1A with the N-terminus of Kv4.2 modulates channel surface expression and gating. *Biochemistry* *46*, 10942–10949.
24. Retterer, K., Juusola, J., Cho, M.T., Vitazka, P., Millan, F., Gibellini, F., Vertino-Bell, A., Smaoui, N., Neidich, J., Monaghan, K.G., et al. (2016). Clinical application of whole-exome sequencing across clinical indications. *Genet. Med.* *18*, 696–704.
25. Jiang, H., Lei, R., Ding, S.W., and Zhu, S. (2014). Skewer: a fast and accurate adapter trimmer for next-generation sequencing paired-end reads. *BMC Bioinformatics* *15*, 182.
26. Li, H., and Durbin, R. (2009). Fast and accurate short read alignment with Burrows-Wheeler transform. *Bioinformatics* *25*, 1754–1760.
27. Schwarz, J.M., Cooper, D.N., Schuelke, M., and Seelow, D. (2014). MutationTaster2: mutation prediction for the deep-sequencing age. *Nat. Methods* *11*, 361–362.
28. Shihab, H.A., Rogers, M.F., Gough, J., Mort, M., Cooper, D.N., Day, I.N.M., Gaunt, T.R., and Campbell, C. (2015). An integrative approach to predicting the functional effects of non-coding and coding sequence variation. *Bioinformatics* *31*, 1536–1543.
29. Reva, B., Antipin, Y., and Sander, C. (2007). Determinants of protein function revealed by combinatorial entropy optimization. *Genome Biol.* *8*.
30. Vaser, R., Adusumalli, S., Leng, S.N., Sikic, M., and Ng, P.C. (2016). SIFT missense predictions for genomes. *Nat. Protoc.* *11*, 1–9.
31. Chun, S., and Fay, J.C. (2009). Identification of deleterious mutations within three human genomes. *Genome Res.* *19*, 1553–1561.
32. Choi, Y., and Chan, A.P. (2015). PROVEAN web server: a tool to predict the functional effect of amino acid substitutions and indels. *Bioinformatics* *31*, 2745–2747.
33. Jaganathan, K., Kyriazopoulou Panagiotopoulou, S., McRae, J.F., Darbandi, S.F., Knowles, D., Li, Y.I., Kosmicki, J.A., Arbe-laez, J., Cui, W., Schwartz, G.B., et al. (2019). Predicting splicing from primary sequence with deep learning. *Cell* *176*, 535–548.e24.
34. Yeo, G., and Burge, C.B. (2003). Maximum entropy modeling of short sequence motifs with applications to RNA splicing signals. *Proc. Annu. Int. Conf. Comput. Mol. Biol. RECOMB* *11*, 322–331.
35. Rentzsch, P., Schubach, M., Shendure, J., and Kircher, M. (2021). CADD-Splice-improving genome-wide variant effect prediction using deep learning-derived splice scores. *Genome Med.* *13*.
36. Richards, S., Aziz, N., Bale, S., Bick, D., Das, S., Gastier-Foster, J., Grody, W.W., Hegde, M., Lyon, E., Spector, E., et al. (2015). Standards and guidelines for the interpretation of sequence variants: a joint consensus recommendation of the American College of medical genetics and genomics and the association for molecular Pathology. *Genet. Med.* *17*, 405–424.
37. Westerfield, M. (2007). *The Zebrafish Book: A Guide for the Laboratory Use of Zebrafish (Danio rerio)* (Eugene: University of Oregon Press).
38. Mably, J.D., Burns, C.G., Chen, J.-N., Fishman, M.C., and Mohideen, M.-A.P. (2003). Heart of glass regulates the concentric growth of the heart in zebrafish. *Curr. Biol.* *13*, 2138–2147.
39. Obholzer, N., Wolfson, S., Trapani, J.G., Mo, W., Nechiporuk, A., Busch-Nentwich, E., Seiler, C., Sidi, S., Söllner, C., Duncan, R.N., et al. (2008). Vesicular glutamate transporter 3 is required for synaptic transmission in zebrafish hair cells. *J. Neurosci.* *28*, 2110–2118.
40. Traver, D., Paw, B.H., Poss, K.D., Penberthy, W.T., Lin, S., and Zon, L.I. (2003). Transplantation and in vivo imaging of multilineage engraftment in zebrafish bloodless mutants. *Nat. Immunol.* *4*, 1238–1246.
41. Beis, D., Bartman, T., Jin, S.W., Scott, I.C., D’Amico, L.A., Ober, E.A., Verkade, H., Frantsve, J., Field, H.A., Wehman, A., et al. (2005). Genetic and cellular analyses of zebrafish atrioventricular cushion and valve development. *Development* *132*, 4193–4204.

42. Kwan, K.M., Fujimoto, E., Grabher, C., Mangum, B.D., Hardy, M.E., Campbell, D.S., Parant, J.M., Yost, H.J., Kanki, J.P., and Chien, C.-B. (2007). The Tol2kit: a multisite gateway-based construction kit for Tol2 transposon transgenesis constructs. *Dev. Dyn.* 236, 3088–3099.
43. Villefranc, J.A., Amigo, J., and Lawson, N.D. (2007). Gateway compatible vectors for analysis of gene function in the zebrafish. *Dev. Dyn.* 236, 3077–3087.
44. Mandal, A., Rydeen, A., Anderson, J., Sorrell, M.R.J., Zygmunt, T., Torres-Vázquez, J., and Waxman, J.S. (2013). Transgenic retinoic acid sensor lines in zebrafish indicate regions of available embryonic retinoic acid. *Dev. Dyn.* 242, 989–1000.
45. Higashijima, S., Okamoto, H., Ueno, N., Hotta, Y., and Eguchi, G. (1997). High-frequency generation of transgenic zebrafish which reliably express GFP in whole muscles or the whole body by using promoters of zebrafish origin. *Dev. Biol.* 192, 289–299.
46. Talbot, J.C., and Amacher, S.L. (2014). A streamlined CRISPR pipeline to reliably generate zebrafish frameshifting alleles. *Zebrafish* 11, 583–585.
47. Hruscha, A., Krawitz, P., Rechenberg, A., Heinrich, V., Hecht, J., Haass, C., and Schmid, B. (2013). Efficient CRISPR/Cas9 genome editing with low off-target effects in zebrafish. *Development* 140, 4982–4987.
48. Gagnon, J.A., Valen, E., Thyme, S.B., Huang, P., Ahkmetova, L., Pauli, A., Montague, T.G., Zimmerman, S., Richter, C., and Schier, A.F. (2014). Efficient Mutagenesis by Cas9 protein-mediated oligonucleotide insertion and large-scale Assessment of single-guide RNAs. *PLoS One* 9, e98186.
49. Oxtoby, E., and Jowett, T. (1993). Cloning of the zebrafish *krox-20* gene (*krx-20*) and its expression during hindbrain development. *Nucleic Acids Res.* 21, 1087–1095.
50. Waxman, J.S., Keegan, B.R., Roberts, R.W., Poss, K.D., and Yelon, D. (2008). *Hoxb5b* acts downstream of retinoic acid signaling in the forelimb field to restrict heart field potential in zebrafish. *Dev. Cell* 15, 923–934.
51. Song, Y.C., Dohn, T.E., Rydeen, A.B., Nechiporuk, A.V., and Waxman, J.S. (2019). HDAC1-mediated repression of the retinoic acid-responsive gene *rippy3* promotes second heart field development. *PLOS Genet.* 15, e1008165.
52. Jing, L. (2012). Fluorescent immunostaining protocol for a-bungarotoxin (AChRs) in zebrafish. *BIO-PROTOCOL* 2, 1–5.
53. Duong, T.B., Ravisankar, P., Song, Y.C., Gafranek, J.T., Rydeen, A.B., Dohn, T.E., Barske, L.A., Crump, J.G., and Waxman, J.S. (2018). *Nr2f1a* balances atrial chamber and atrioventricular canal size via BMP signaling-independent and -dependent mechanisms. *Dev. Biol.* 434, 7–14.
54. Detrich, H.W., Kieran, M.W., Chan, F.Y., Barone, L.M., Yee, K., Rundstadler, J.A., Pratt, S., Ransom, D., and Zon, L.I. (1995). Intraembryonic hematopoietic cell migration during vertebrate development. *Proc. Natl. Acad. Sci. U. S. A.* 92, 10713–10717.
55. Panáková, D., Werdich, A.A., and MacRae, C.A. (2010). Wnt11 patterns a myocardial electrical gradient through regulation of the L-type Ca<sup>2+</sup> channel. *Nature* 466, 874–878.
56. Burkhard, S.B., and Bakkers, J. (2018). Spatially resolved RNA-sequencing of the embryonic heart identifies a role for Wnt/ $\beta$ -catenin signaling in autonomic control of heart rate. *Elife* 7, 1–19.
57. Sheehan, D.C., Hrapchak, B.B., and Enterline, H.T. (1987). *Theory and Practice of Histotechnology* (Battelle Press).
58. Woods, A.E., and Stirling, J.W. (2013). Transmission electron microscopy. In *Bancroft's Theory and Practice of Histological Techniques*, S.K. Suvarna, C. Layton, and J.D. Bancroft, eds. (Elsevier), pp. 493–538.
59. D'Aniello, E., Rydeen, A.B., Anderson, J.L., Mandal, A., and Waxman, J.S. (2013). Depletion of retinoic acid receptors initiates a novel positive feedback mechanism that promotes teratogenic increases in retinoic acid. *Plos Genet.* 9, e1003689.
60. Livak, K.J., and Schmittgen, T.D. (2001). Analysis of relative gene expression data using real-time quantitative PCR and the 2 $^{-\Delta\Delta CT}$  method. *Methods* 25, 402–408.
61. Misura, K.M.S., Scheller, R.H., and Weis, W.I. (2000). Three-dimensional structure of the neuronal-Sec1-syntaxin 1a complex. *Nature* 404, 355–362.
62. Sobreira, N., Schietecatte, F., Valle, D., and Hamosh, A. (2015). GeneMatcher: a matching tool for connecting investigators with an interest in the same gene. *Hum. Mutat.* 36, 928–930.
63. Yang, C., Coker, K.J., Kim, J.K., Mora, S., Thurmond, D.C., Davis, A.C., Yang, B., Williamson, R.A., Shulman, G.I., and Pessin, J.E. (2001). Syntaxin 4 heterozygous knockout mice develop muscle insulin resistance. *J. Clin. Invest.* 107, 1311–1318.
64. Stainier, D.Y., Fouquet, B., Chen, J.N., Warren, K.S., Weinstein, B.M., Meiler, S.E., Mohideen, M.A., Neuhaus, S.C., Solnica-Krezel, L., Schier, A.F., et al. (1996). Mutations affecting the formation and function of the cardiovascular system in the zebrafish embryo. *Development* 123, 285–292.
65. Bertuccio, C.A., Wang, T.T., Hamilton, K.L., Rodriguez-Gil, D.J., Condliffe, S.B., and Devor, D.C. (2018). Plasma membrane insertion of KCa2.3 (SK3) is dependent upon the SNARE proteins, syntaxin-4 and SNAP23. *PLoS One* 13, 1–20.
66. Predescu, S.A., Predescu, D.N., Shimizu, K., Klein, I.K., and Malik, A.B. (2005). Cholesterol-dependent syntaxin-4 and SNAP-23 clustering regulates caveolar fusion with the endothelial plasma membrane. *J. Biol. Chem.* 280, 37130–37138.
67. Tessadori, F., van Weerd, J.H., Burkhard, S.B., Verkerk, A.O., de Pater, E., Boukens, B.J., Vink, A., Christoffels, V.M., and Bakkers, J. (2012). Identification and functional characterization of cardiac pacemaker cells in zebrafish. *PLoS One* 7, 1–9.
68. Yang, S.N., Larsson, O., Bränström, R., Bertorello, A.M., Leibiger, B., Leibiger, I.B., Moede, T., Köhler, M., Meister, B., and Berggren, P.O. (1999). Syntaxin 1 interacts with the L(D) subtype of voltage-gated Ca(2+) channels in pancreatic beta cells. *Proc. Natl. Acad. Sci. U. S. A.* 96, 10164–10169.
69. Alday, A., Alonso, H., Gallego, M., Urrutia, J., Letamendia, A., Callol, C., and Casis, O. (2014). Ionic channels underlying the ventricular action potential in zebrafish embryo. *Pharmacol. Res.* 84, 26–31.
70. Bovo, E., Dvornikov, A.V., Mazurek, S.R., de Tombe, P.P., and Zima, A.V. (2013). Mechanisms of Ca<sup>2+</sup> handling in zebrafish ventricular myocytes. *Pflügers Arch. - Eur. J. Physiol.* 465, 1775–1784.
71. Adzhubei, I.A., Schmidt, S., Peshkin, L., Ramensky, V.E., Gerasimova, A., Bork, P., Kondrashov, A.S., and Sunyaev, S.R. (2010). A method and server for predicting damaging missense mutations. *Nat. Methods* 7, 248–249.
72. Karczewski, K.J., Francioli, L.C., Tiao, G., Cummings, B.B., Alfoldi, J., Wang, Q., Collins, R.L., Laricchia, K.M., Ganna, A., Birnbaum, D.P., et al. (2020). The mutational constraint

- spectrum quantified from variation in 141,456 humans. *Nature* 581, 434–443.
73. Alhendi, A.S.N., Lim, D., McKee, S., McEntagart, M., Tatton-Brown, K., Temple, I.K., Davies, J.H., and Mackay, D.J.G. (2021). Whole-genome analysis as a diagnostic tool for patients referred for diagnosis of Silver-Russell syndrome: a real-world study. *J. Med. Genet.* jmedgenet-2021-107699. <https://doi.org/10.1136/jmedgenet-2021-107699>.
  74. Peters, C.G., Miller, D.F., and Giovannucci, D.R. (2006). Identification, localization and interaction of SNARE proteins in atrial cardiac myocytes. *J. Mol. Cell. Cardiol.* 40, 361–374.
  75. Ferlito, M., Fulton, W.B., Zauher, M.A., Marbán, E., Steenbergen, C., and Lowenstein, C.J. (2010). VAMP-1, VAMP-2, and syntaxin-4 regulate ANP release from cardiac myocytes. *J. Mol. Cell. Cardiol.* 49, 791–800.
  76. Gottlieb, S.S., Kukin, M.L., Ahern, D., and Packer, M. (1989). Prognostic importance of atrial natriuretic peptide in patients with chronic heart failure. *J. Am. Coll. Cardiol.* 13, 1534–1539.
  77. Grusovin, J., and Macaulay, S.L. (2003). Snares for GLUT4—mechanisms directing vesicular trafficking of GLUT4. *Front Biosci.* 8, d620–d641.
  78. Tellam, J.T., Macaulay, S.L., McIntosh, S., Hewish, D.R., Ward, C.W., and James, D.E. (1997). Characterization of Munc-18c and syntaxin-4 in 3T3-L1 adipocytes. Putative role in insulin-dependent movement of GLUT-4. *J. Biol. Chem.* 272, 6179–6186.
  79. Volchuk, A., Wang, Q., Ewart, H.S., Liu, Z., He, L., Bennett, M.K., and Klip, A. (1996). Syntaxin 4 in 3T3-L1 adipocytes: regulation by insulin and participation in insulin-dependent glucose transport. *Mol. Biol. Cell* 7, 1075–1082.
  80. Bowman, P.R.T., Smith, G.L., and Gould, G.W. (2019). Cardiac SNARE expression in Health and disease. *Front. Endocrinol. (Lausanne).* 10, 1–10.
  81. Kawai, S., Michikami, I., Kitagaki, J., Hata, K., Kiyonari, H., Abe, T., Amano, A., and Wakisaka, S. (2017). Syntaxin 4a regulates matrix vesicle-mediated bone matrix production by osteoblasts. *J. Bone Miner. Res.* 32, 440–448.
  82. Sanchez, E., Gonzalez, E.A., Moreno, D.S., Cardenas, R.A., Ramos, M.A., Davalos, A.J., Manllo, J., Rodarte, A.I., Petrova, Y., Moreira, D.C., et al. (2019). Syntaxin 3, but not syntaxin 4, is required for mast cell–regulated exocytosis, where it plays a primary role mediating compound exocytosis. *J. Biol. Chem.* 294, 3012–3023.
  83. Jansen, K., Vandeput, S., Van Huffel, S., and Lagae, L. (2012). Cardiac autonomic dysfunction in West syndrome. *Epilepsy Res.* 102, 167–172.
  84. Grone, B.P., Marchese, M., Hamling, K.R., Kumar, M.G., Krasniak, C.S., Sicca, F., Santorelli, F.M., Patel, M., and Baraban, S.C. (2016). Epilepsy, behavioral abnormalities, and physiological comorbidities in syntaxin-binding protein 1 (STXBP1) mutant zebrafish. *PLoS One* 11, 1–25.
  85. Cooper, E.C. (2012). Potassium Channels (Including KCNQ) and Epilepsy (National Center for Biotechnology Information (US)).
  86. Ravens, U. (2018). Ionic basis of cardiac electrophysiology in zebrafish compared to human hearts. *Prog. Biophys. Mol. Biol.* 138, 38–44.
  87. Ciruna, B., Weidinger, G., Knaut, H., Thisse, B., Thisse, C., Raz, E., and Schier, A.F. (2002). Production of maternal-zygotic mutant zebrafish by germ-line replacement. *Proc. Natl. Acad. Sci. U. S. A.* 99, 14919–14924.
  88. Rottbauer, W., Baker, K., Wo, Z.G., Mohideen, M.A., Cantiello, H.F., and Fishman, M.C. (2001). Growth and function of the embryonic heart depend upon the cardiac-specific L-type calcium channel alpha1 subunit. *Dev. Cell* 1, 265–275.
  89. Rodan, L.H., Spillmann, R.C., Kurata, H.T., Lamothe, S.M., Maghera, J., Jamra, R.A., Alkelai, A., Antonarakis, S.E., Atallah, I., Bar-Yosef, O., et al. (2021). Phenotypic expansion of CACNA1C-associated disorders to include isolated neurological manifestations. *Genet. Med.* 23, 1922–1932.
  90. Soward, A.L., Vanhaleweyck, G.L.J., and Serruys, P.W. (1986). The haemodynamic effects of nifedipine, verapamil and diltiazem in patients with coronary artery disease. *A. Review. Drugs* 32, 66–101.
  91. Hata, Y., Yoshida, K., Kinoshita, K., and Nishida, N. (2017). Epilepsy-related sudden unexpected death: targeted next-generation analysis of inherited heart disease genes using next-generation DNA sequencing. *Brain Pathol.* 27, 292–304.
  92. Harrison, M.R.M., Bussmann, J., Huang, Y., Zhao, L., Osorio, A., Burns, C.G., Burns, C.E., Sucov, H.M., Siekmann, A.F., and Lien, C.L. (2015). Chemokine-guided angiogenesis directs coronary vasculature formation in zebrafish. *Dev. Cell* 33, 442–454.
  93. Spears, D.A., and Gollob, M.H. (2015). Genetics of inherited primary arrhythmia disorders. *Appl. Clin. Genet.* 8, 215–233.
  94. Kline, C.F., and Mohler, P.J. (2014). Defective interactions of protein partner with ion channels and transporters as alternative mechanisms of membrane channelopathies. *Biochim. Biophys. Acta - Biomembr.* 1838, 723–730.
  95. Mohler, P.J., Schott, J.J., Gramolini, A.O., Dilly, K.W., Guatimosim, S., DuBell, W.H., Song, L.S., Haurogné, K., Kyndt, F., Ali, M.E., et al. (2003). Ankyrin-B mutation causes type 4 long-QT cardiac arrhythmia and sudden cardiac death. *Nature* 421, 634–639.
  96. Vatta, M., Ackerman, M.J., Ye, B., Makielski, J.C., Ughanze, E.E., Taylor, E.W., Tester, D.J., Balijepalli, R.C., Foell, J.D., Li, Z., et al. (2006). Mutant caveolin-3 induces persistent late sodium current and is associated with long-QT syndrome. *Circulation* 114, 2104–2112.
  97. van der Linde, D., Konings, E.E.M., Slager, M.A., Witsenburg, M., Helbing, W.A., Takkenberg, J.J.M., and Roos-Hesselink, J.W. (2011). Birth prevalence of congenital heart disease worldwide: a systematic review and Meta-analysis. *J. Am. Coll. Cardiol.* 58, 2241–2247.
  98. Bernier, P.L., Stefanescu, A., Samoukovic, G., and Tchervenkov, C.I. (2010). The challenge of congenital heart disease worldwide: epidemiologic and demographic facts. *Semin. Thorac. Cardiovasc. Surg. Pediatr. Card. Surg. Annu.* 13, 26–34.
  99. Khairy, P., and Balaji, S. (2009). Cardiac arrhythmias in congenital heart diseases. *Indian Pacing Electrophysiol. J.* 9, 299–317. PMID: PMC2766579.
  100. Triedman, J.K. (2002). Arrhythmias in adults with congenital heart disease. *Heart* 87, 383–389.
  101. Tavera, M.C., Foresti, S., and Cappato, R. (2007). Arrhythmia in congenital heart disease. *Eur. Cardiol. Rev.* 3, 110.
  102. Hernández-Madrid, A., Paul, T., Abrams, D., Aziz, P.F., Blom, N.A., Chen, J., Chessa, M., Combes, N., Dagues, N., Diller, G., et al. (2018). Arrhythmias in congenital heart disease: a position paper of the European heart rhythm association



- (EHRA), association for European paediatric and congenital cardiology (AEPC), and the European society of cardiology (ESC) working group on grown-up congenital heart disease, endorsed by HRS, PACES, APHRS, and SOLAECE. *EP Eur*. 20, 1719–1753.
103. Virani, S.S., Alonso, A., Aparicio, H.J., Benjamin, E.J., Bittencourt, M.S., Callaway, C.W., Carson, A.P., Chamberlain, A.M., Cheng, S., Delling, F.N., et al. (2021). Heart disease and stroke statistics—2021 update. *Circulation* 143, E254–E743.
104. Krahn, A.D., Healey, J.S., Chauhan, V., Birnie, D.H., Simpson, C.S., Champagne, J., Gardner, M., Sanatani, S., Exner, D.V., Klein, G.J., et al. (2009). Systematic assessment of patients with unexplained cardiac arrest: cardiac arrest survivors with preserved ejection fraction registry (CASPER). *Circulation* 120, 278–285.

**HGGA, Volume 3**

**Supplemental information**

**Stx4 is required to regulate cardiomyocyte Ca<sup>2+</sup>  
handling during vertebrate cardiac development**

**Eliyahu Perl, Padmapriyadarshini Ravisankar, Manu E. Beerens, Lejla Mulahasanovic, Kelly Smallwood, Marion Bermúdez Sasso, Carina Wenzel, Thomas D. Ryan, Matej Komár, Kevin E. Bove, Calum A. MacRae, K. Nicole Weaver, Carlos E. Prada, and Joshua S. Waxman**

## **Supplemental Information**

| <b>Table of Contents</b>                            | <b>page</b> |
|-----------------------------------------------------|-------------|
| <b>Supplemental notes</b>                           |             |
| <b>Supplemental note: Case Report for Patient 1</b> | <b>2</b>    |
| <b>Supplemental note: Case Report for Patient 2</b> | <b>3</b>    |
| <b>Supplemental Figures</b>                         |             |
| <b>Figure S1</b>                                    | <b>5</b>    |
| <b>Figure S2</b>                                    | <b>6</b>    |
| <b>Figure S3</b>                                    | <b>7</b>    |
| <b>Figure S4</b>                                    | <b>8</b>    |
| <b>Figure S5</b>                                    | <b>10</b>   |
| <b>Figure S6</b>                                    | <b>12</b>   |
| <b>Figure S7</b>                                    | <b>13</b>   |
| <b>Figure S8</b>                                    | <b>14</b>   |
| <b>Supplemental Tables</b>                          |             |
| <b>Table S1</b>                                     | <b>15</b>   |
| <b>Table S2</b>                                     | <b>17</b>   |
| <b>Table S3</b>                                     | <b>20</b>   |
| <b>Table S4</b>                                     | <b>21</b>   |
| <b>Supplemental References</b>                      | <b>22</b>   |



## **Supplemental note: Case Report for Patient 1**

Patient 1 presented with progressive fatigue at three years of age. Initial evaluation in the emergency room was significant for increased work of breathing, hypotension, and severe acidosis. Previous medical history was significant for congenital profound sensorineural hearing loss, hypotonia, and global developmental delays. Echocardiography showed Patient 1 to have dilated cardiomyopathy (DCM) with severely depressed biventricular systolic function, and he was electively intubated and managed with calcium and milrinone infusion to augment cardiac output. Patient 1 developed frequent ectopy (premature atrial and ventricular contractions) with runs of non-sustained ventricular tachycardia (VT). Subsequently, he was placed on extracorporeal membrane oxygenation (ECMO) and continued to have hypotension and episodes of VT. Patient 1 was initially managed with propranolol but required an esmolol drip due to the progressive arrhythmia. Due to his instability, a transeptal puncture with bladed and serial balloon atrial septoplasty was performed and resulted in substantial left atrial decompression with overall improvement of right atrial and ventricular filling and systolic function. Patient 1 was subsequently placed on a Berlin Heart EXCOR<sup>®</sup> left ventricular assist device (LVAD) and continued to have prolonged episodes of VT, requiring amiodarone and atrial single chamber (AAI) pacing for a period of time. The LVAD was changed to a CentriMag<sup>™</sup> Extracorporeal Blood Pumping System to better unload the left ventricle. He was then placed on a biventricular assist device (BiVAD), which improved LVAD filling and cardiac output but did not affect his continuous VT. Ultimately, Patient 1 received an orthotopic heart transplant (OHT) two months from the onset of his initial symptoms. Patient 1's muscular weakness was progressive after OHT, and he required a tracheostomy with ventilatory support for the inability to tolerate coming off of mechanical ventilation. His course since transplant has been notable for multiple infections, likely related to chronic immunosuppression, as well as poor somatic growth on enteral feeds. He remains ventilator dependent. The transplanted heart shows normal function without evidence for graft coronary artery disease at five years of age, and there have been no significant episodes of rejection. Despite atrial tachycardia shortly after transplant, he has been weaned off beta blocker therapy and has had no further ectopy, to date. Patient 1 is nine years of age at the time of publication and has

a sibling who is regularly screened for DCM and is asymptomatic as of five years of age. The sibling is homozygous for the reference (WT) *STX4* allele (Figure S2).

### **Supplemental note: Case Report for Patient 2**

Patient 2 presented upon fetal ultrasound at 25+0 weeks of gestation with multiple anomalies including frontal edema, persistent ductus arteriosus, oligohydramnios, hypoplastic kidneys, severely dilated echogenic small bowel loops, duodenal atresia, and overlapping fingers. At 30+4 weeks of pregnancy, Patient 2 was delivered via secondary cesarean section due to complications of anhydramnios and induction of premature labor. TORCH complex was excluded prenatally, and there were no signs of other noxious agents during pregnancy. At delivery, Patient 2 exhibited normal birth measurements including, size, weight, and head circumference; however, a short umbilical cord was noted. Upon postnatal evaluation, Patient 2 exhibited multiple malformations, including pulmonary hypoplasia, hepatomegaly, duodenal atresia, renal dysplasia, a small urinary bladder, scoliosis, clubfoot, and musculoskeletal contractures of the right hand, elbow, and foot (Figure S3). Postnatal echocardiography showed normal heart arrangement, a patent foramen ovale with aneurysms of the septum, a persistent ductus arteriosus, and T1 1-2° and moderately reduced left ventricular-function. The patient also displayed facial dysmorphism, including retrognathia, a tent-shaped mouth and small, dysplastic low-set, posteriorly rotated ears. Due to the prenatal WES, chromosomal analysis was performed after birth but was normal. In addition to the multiple congenital anomalies, Patient 2 had massive ubiquitous edema and required ventilatory support; he subsequently died five days after birth. Upon autopsy, the cause of death was determined to be consistent with multi-organ failure. A cerebral MRI performed post-mortem indicated a subarachnoid hemorrhage, but was unremarkable for neuronal migration or gyration disorders, although partial pachygyria was noted upon autopsy. Other pertinent findings included renal hypoplasia, pulmonary hypoplasia, and malposition of the vermiform appendix. Calcifications on the posterior wall of the heart were also noted; the patent foramen ovale and persistent ductus arteriosus were documented to be consistent with the early gestational birth. Aspects of the pleotropic phenotypes listed were differentially noted to possibly be secondary to the anhydramnios/oligohydramnios or due to gestational

age at delivery. However, the etiology of the anhydramnios was not clinically resolved. Patient 2 has one sibling who is healthy as of four months of age. Notably, the mother's first pregnancy terminated as a spontaneous abortion in the first trimester. Genetic testing of the living sibling was unavailable at time of publication (Figure 1C).



## Supplemental Figures

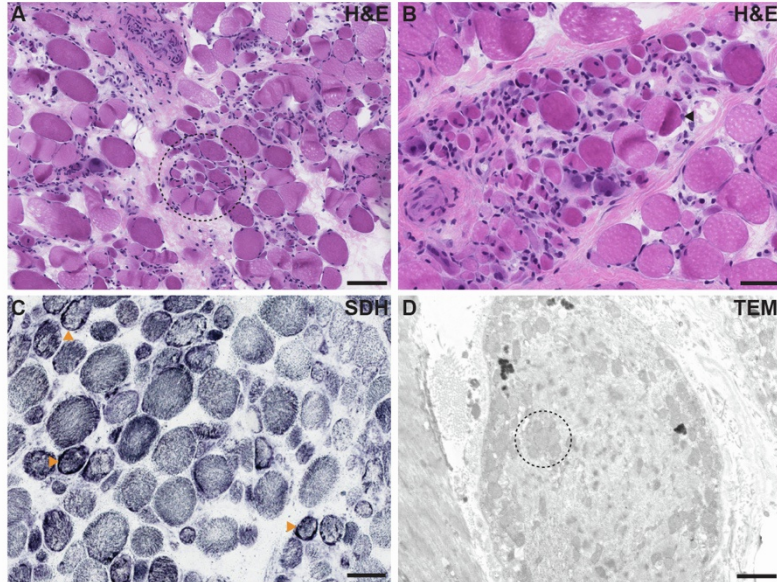

**Figure S1. Histopathology of heart and skeletal muscle biopsy of Patient 1.** (A,B) Cross-sections from a biopsy of the explanted heart of Patient 1 stained with hematoxylin-eosin. (A) Diminished myocardial cross-striations, interstitial fibrosis, hypertrophic fibers, loss of myofibrillar volume, and marked variation in fiber size (circled) are observed. Scale bar: 100  $\mu$ M. (B) Micrograph of the explanted heart at high magnification shows numerous mainly rounded atrophic fibers (arrowhead), both single and in small groups. Scale bar: 50  $\mu$ M. (C) Succinic acid dehydrogenase staining of skeletal muscle biopsy shows a normal quantity and distribution of mitochondria in most fibers and the occasional ragged blue fiber (orange arrowheads). Scale bar: 50  $\mu$ M. (D) Transmission electron micrographs of skeletal muscle biopsy show endomysial fibrosis, increased mitochondrial aggregates (circled), with multiple scattered fibers showing regeneration or degeneration. No significant inflammatory infiltrates are detectable, nor is there appreciable vacuolization within the myofibers. Scale bar: 2  $\mu$ M.

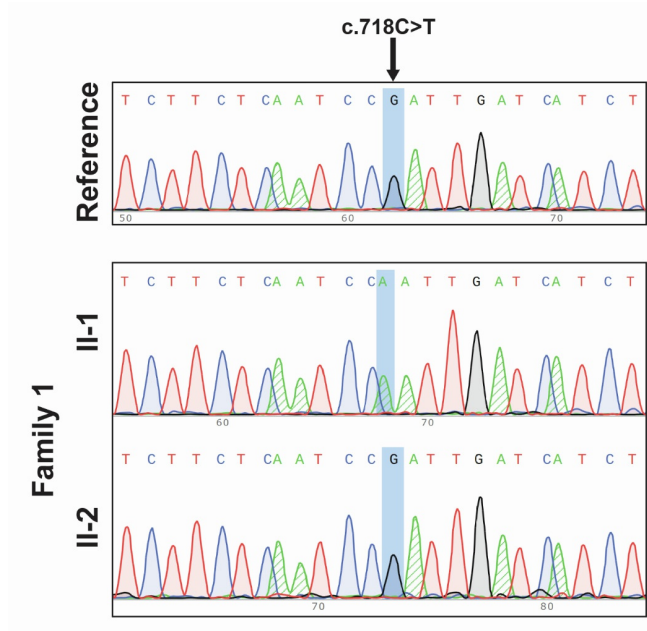

**Figure S2. Targeted *STX4* variant testing of Patient 1 and sibling.** Chromatogram traces of the amplified complementary *STX4* sequence in both Patient 1 (II-1) and their sibling (II-2) compared to an unaffected control individual (reference). Arrow indicates the position of the c.718C>T variant. Patient 1 is homozygous for the variant, while their sibling is homozygous for the reference allele as compared to the unaffected individual.

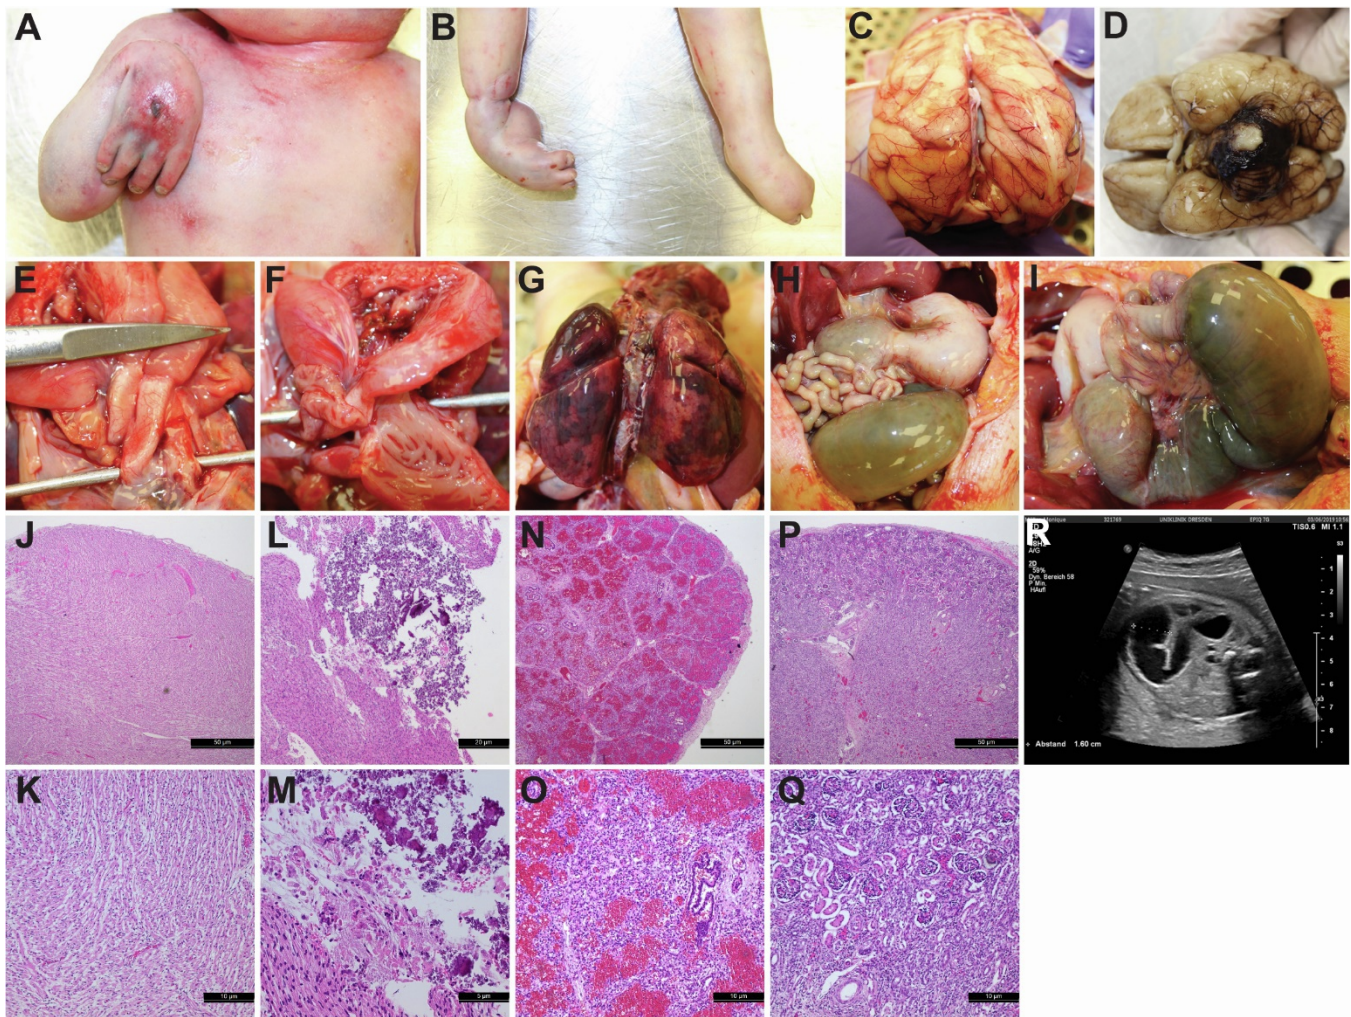

**Figure S3. Autopsy and gross histology of patient with compound heterozygous truncating *STX4* variants.** (A,B) External malformations of patient 2 depicting hyperflexion of the right hand and clubfoot, respectively. (C,D) Pachygyria of the cerebral cortex and cerebellar subarachnoid hemorrhage, identified upon autopsy. (E,F). Persistent ductus arteriosus (PDA) and patent foramen ovale, respectively, are noted with probes demarcating each defect. (G) Lung lobes depicting grossly normal appearance. (H,I) Stenotic ileum with prestenotic dilatation of the duodenum/ileum as well as stomach. (J-M) Cross-sections from a biopsy of the explanted heart of Patient 2 stained with hematoxylin-eosin. (J) Anterior wall of the heart is grossly normal (Scale bar: 50  $\mu$ M), and (K) without significant signs of hypertrophy (Scale bar: 10  $\mu$ M). (L,M) Dystrophic calcification was observed on the posterior wall of the heart, without significant signs of hypertrophy. Scale bars: 20  $\mu$ M and 5  $\mu$ M, respectively. (N,O) Cross-sections from lung shows partially developed, somewhat delayed lung parenchyma. Scale bars: 50  $\mu$ M and 10  $\mu$ M, respectively. (O) Parenchyma at saccular stage of development with acute blood congestion. (P,Q) Cross-sections from kidney show slightly hypoplastic kidneys with regularly developed kidney parenchyma. 50  $\mu$ M and 10  $\mu$ M, respectively (R) Prenatal ultrasound of patient 2 depicts abnormal, severely dilated intestinal loop.



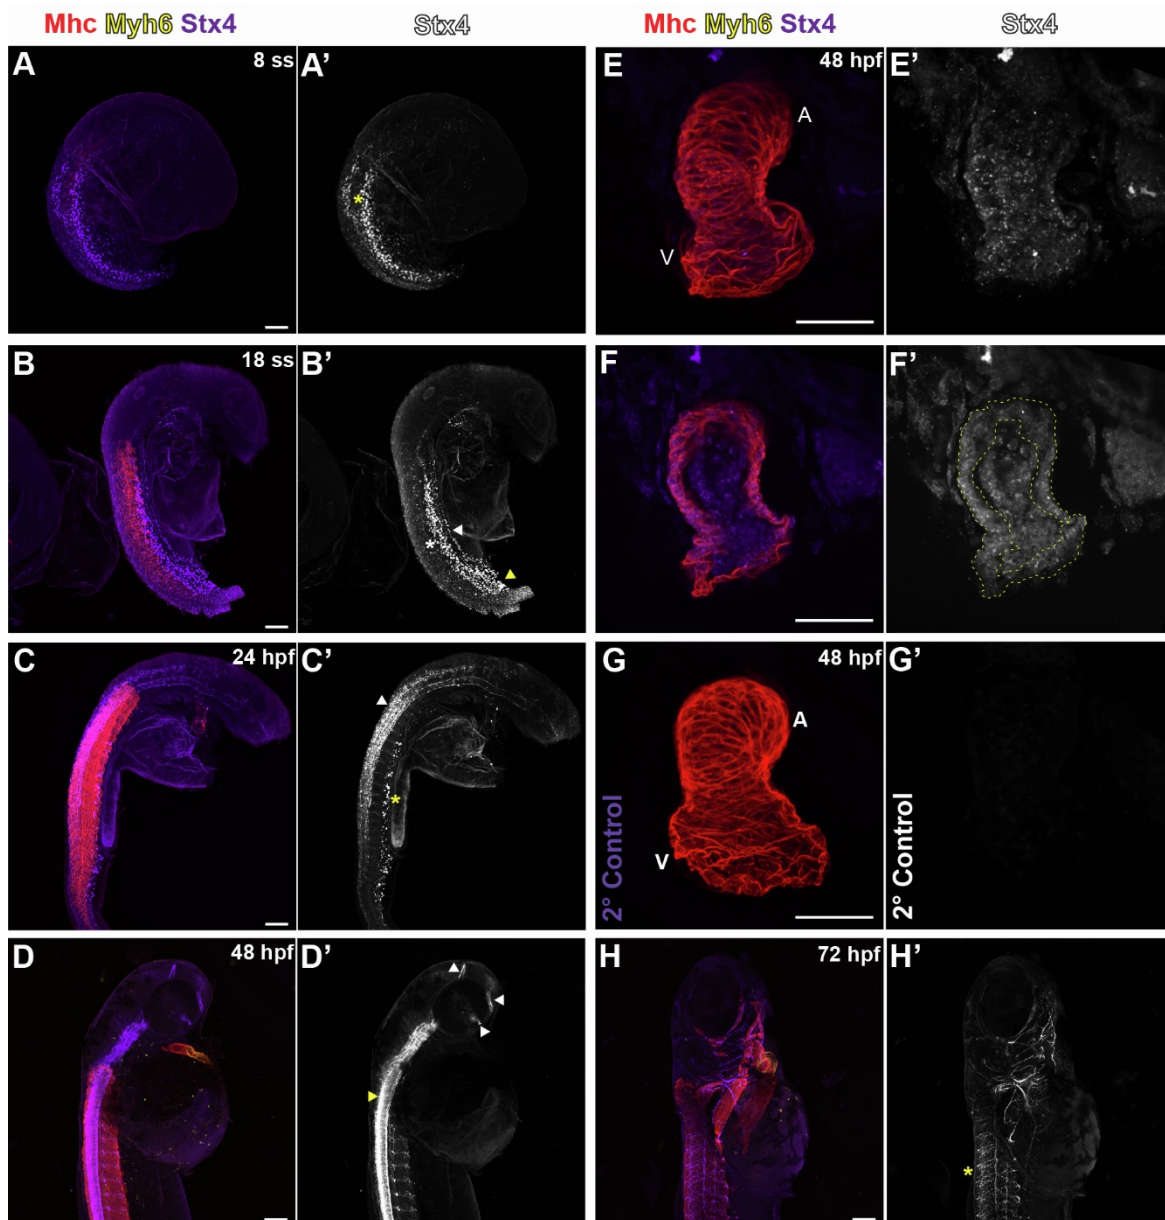

**Figure S4. Stx4 expression is temporally refined during zebrafish development.** (A-H') Confocal max intensity projections (MIPs) of embryos at the 8-somite stage (ss), 18 ss, 24 hpf, 48 hpf, and 72 hpf. IHC for Mhc (striated muscle - red), Myh6 (atrial cardiomyocytes (CMs) - yellow), and Stx4 (purple). (A'-H') Single channel micrographs of Stx4 in A-H. (A,A') At the 8 ss, Stx4 is enriched in the posterior lateral mesoderm (yellow asterisk). (B,B') At the 18 ss, Stx4 becomes refined to the ventral vasculature (white arrowhead), blood progenitors (yellow arrowhead), and pronephros (white asterisk). (C,C') At 24 hpf, Stx4 is enriched in ventral vascular cells (asterisk) and spinal cord (white arrowhead). (D,D') By 48 hpf, Stx4 becomes predominantly neuronally-enriched in several forebrain white matter tracts (including the habenula, posterior, and post-optic commissures (white arrowheads), and spinal cord (yellow arrowhead)). (E,E') Confocal image of Stx4 expressed in the heart at 48 hpf (white puncta). (F,F') MIP of a partial Z-stack of the heart shown in E. Stx4 signal intensity was enhanced relative to E,G and E',G', respectively, to show clear demarcation of Stx4 expression in the heart, including in the myocardium (outlined). (G,G') 48 hpf zebrafish heart stained for Mhc (red) and secondary antibody used for Stx4 antibody alone (anti-rabbit IgG(H+L) Alexa Fluor®-647) (negative control) demonstrates the specificity of the Stx4 antibody staining in the heart at 48 hpf. A: atrium; V:

ventricle. (H,H') At 72 hpf, Stx4 is expressed predominantly in the peripheral nervous system (yellow asterisk indicates motor neurons in the axial myomeres). (A-D,H) Scale bar: 100  $\mu$ M. (E-G) Scale bars: 50  $\mu$ M.

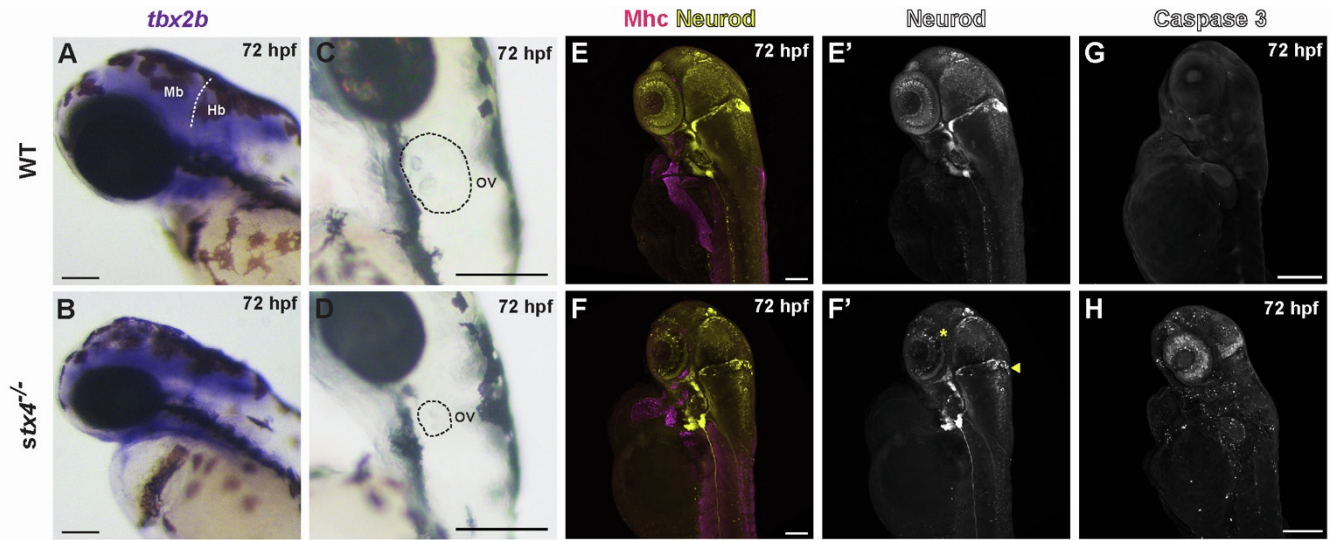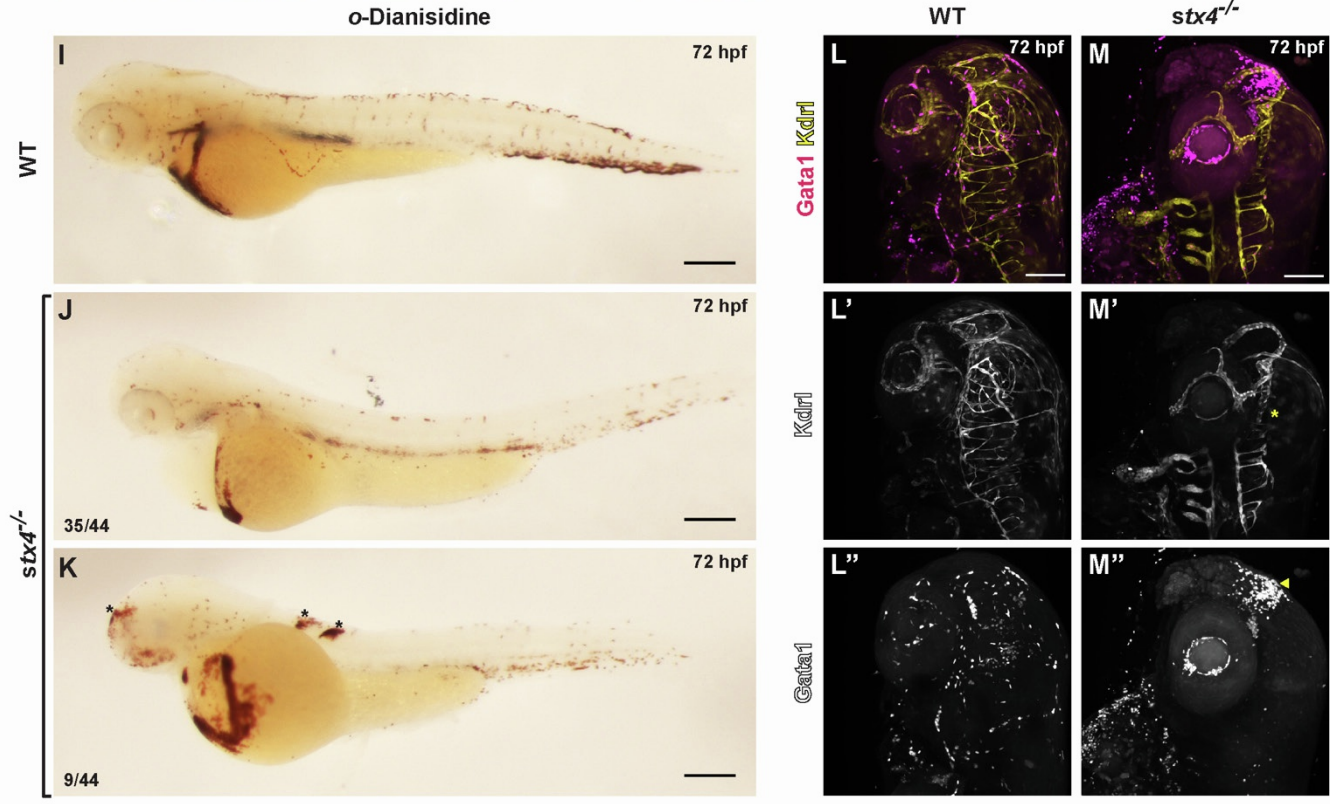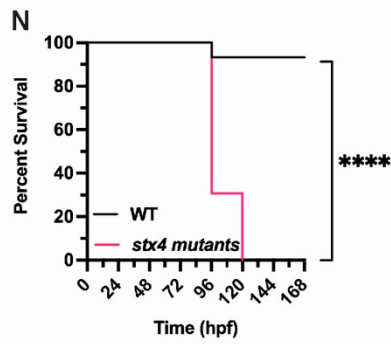

**Figure S5. *Stx4* is required for neurodevelopment and vasculogenesis.** (A,B) *In situ* hybridization (ISH) showing *tbx2b* expression in 72 hpf WT and *stx4* mutant larvae. *Stx4* mutants exhibit a loss of the midbrain-hindbrain transition. Mb: midbrain, Hb: hindbrain. Scale bar: 200  $\mu$ M. (C,D) Brightfield images of 72 hpf WT and *stx4* mutant larvae otic vesicles. *Stx4* mutant have atrophic otic vesicles (outlined) with smaller otoliths. OV: otic vesicle. Scale bar: 200  $\mu$ M. (E,F) Confocal images of 72 hpf WT and *stx4* mutant larvae labelled with IHC for Mhc (magenta) and *neurod:EGFP* (yellow). (E',F') *stx4* mutants with the *neurod:EGFP* transgene showing disorganized cerebellum (arrowhead) and fewer, less-organized retinal progenitor cells (asterisk). Scale bar: 100  $\mu$ M. (G,H) Confocal max intensity projections (MIPs) of IHC on 72 WT and *stx4* mutant larvae labelled with cleaved-Caspase 3. *Stx4* mutants exhibit a significant amount of cell death, particularly in the brain and eye. Scale bar: 200  $\mu$ M. (I-K) 72 hpf WT and *stx4* mutant larvae labelled with *o*-dianisidine, which labels hemoglobin in the erythrocytes (red). Asterisks indicate hemorrhaging from the craniopharyngeal or intersegmental vasculature observed in ~20% of mutant larvae ( $n = 9/44$  zebrafish). Scale bar: 200  $\mu$ M. (L,M) Confocal MIPs of 72 hpf WT or *stx4* mutant larvae carrying the *Tg(kdr1:EGFP)*; *Tg(gata1:dsRed)* transgenes. (L',M') Single channel images showing *kdr1:EGFP* expression. Asterisk in K' indicates enlarged primordial mid/hindbrain channels and the agenesis of central arteries observed in *stx4* mutants. (L'',M'') Single channel images of *gata1:dsRed*. Arrowhead indicates hemorrhaging observed from central arteries in the forebrain of *stx4* mutant. Scale bar: 100  $\mu$ M. Views in images are lateral with anterior up or to the left. (N) Survival curve of *stx4* mutant zebrafish. WT/*stx4*<sup>+/-</sup> zebrafish exhibit a 93.33% survival rate past 96 hpf, by contrast 30.77% of *stx4* mutants survive past 96 hpf and all die by 120 hpf. Data are represented as percent survival of  $n = 30$  WT/*stx4*<sup>+/-</sup> and  $n = 26$  *stx4*<sup>-/-</sup> mutant zebrafish, Log-rank (Mantel-Cox) test, \*\*\*\* $p < 0.0001$ .



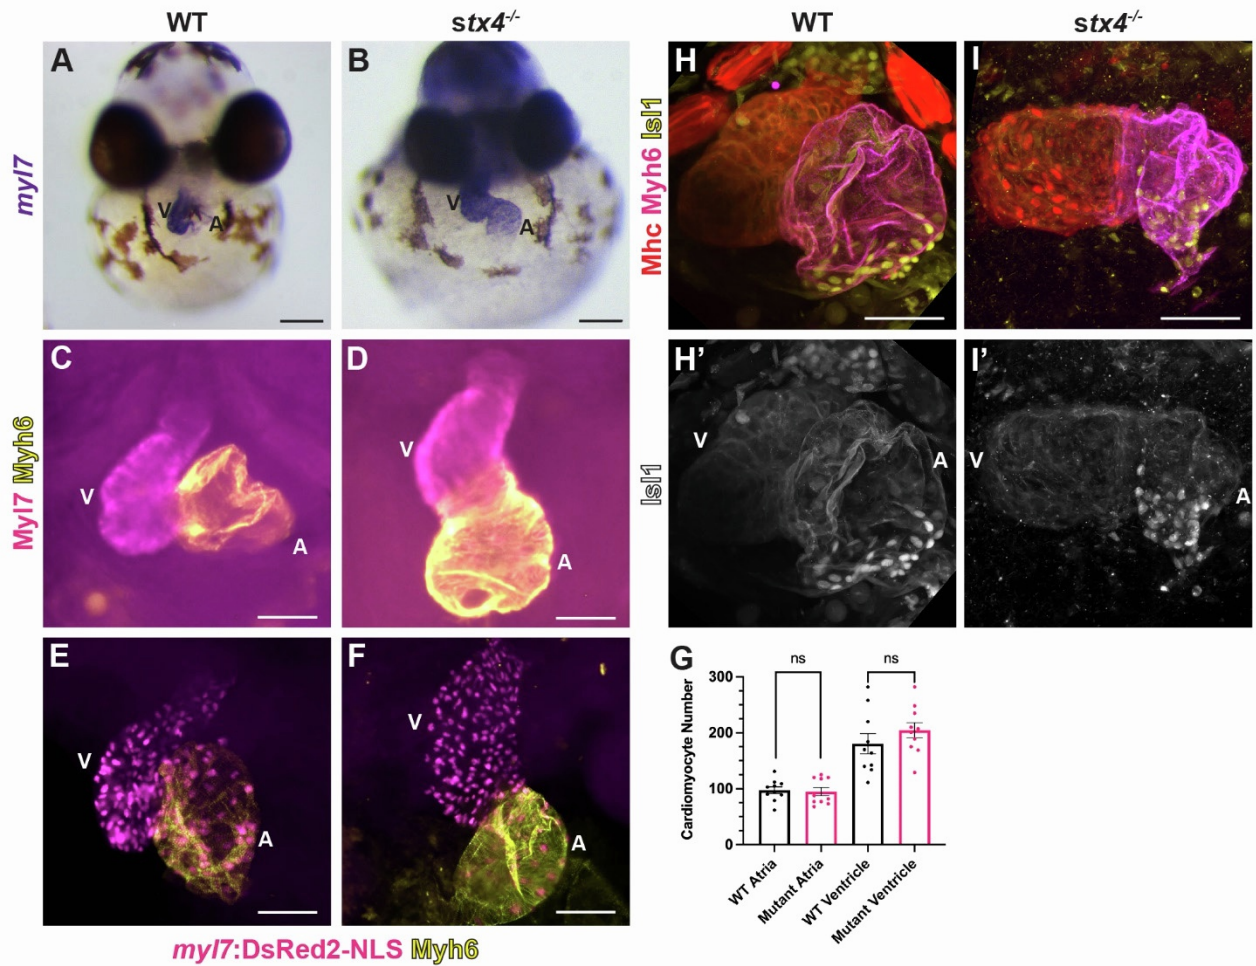

**Figure S6. Stx4 is dispensable for CM differentiation.** (A,B) Whole-mount ISH for *myl7* in 72 hpf WT and *stx4* mutant larvae. Frontal views. Scale bar: 100  $\mu$ M. (C,D) IHC for Myh7 (ventricular CMs – magenta) and Myh6 (yellow) in hearts of 72 hpf WT and *stx4* mutant larvae. Scale bar: 50  $\mu$ M. (E,F) IHC of representative hearts from 72 hpf WT and *stx4* mutant larvae carrying the *myl7:DsRed2-NLS* transgene and labeled for Myh6 (yellow) used for CM quantification. Scale bar: 50  $\mu$ M. (G) Quantification of atrial and ventricular CMs hearts from 72 hpf WT and *stx4* mutant larvae. Data are represented as the mean  $\pm$  SEM,  $n = 10$  larvae/group, Student's t-test. (H,I) Confocal images of IHC for Mhc (magenta), Myh6 (red), and Isl1 (pacemaker CMs – yellow) in hearts of 72 hpf WT and *stx4* mutant larvae. (H',I') Single channel images of Isl1 at the venous pole. Scale bar: 50  $\mu$ M. A: atrium; V: ventricle.

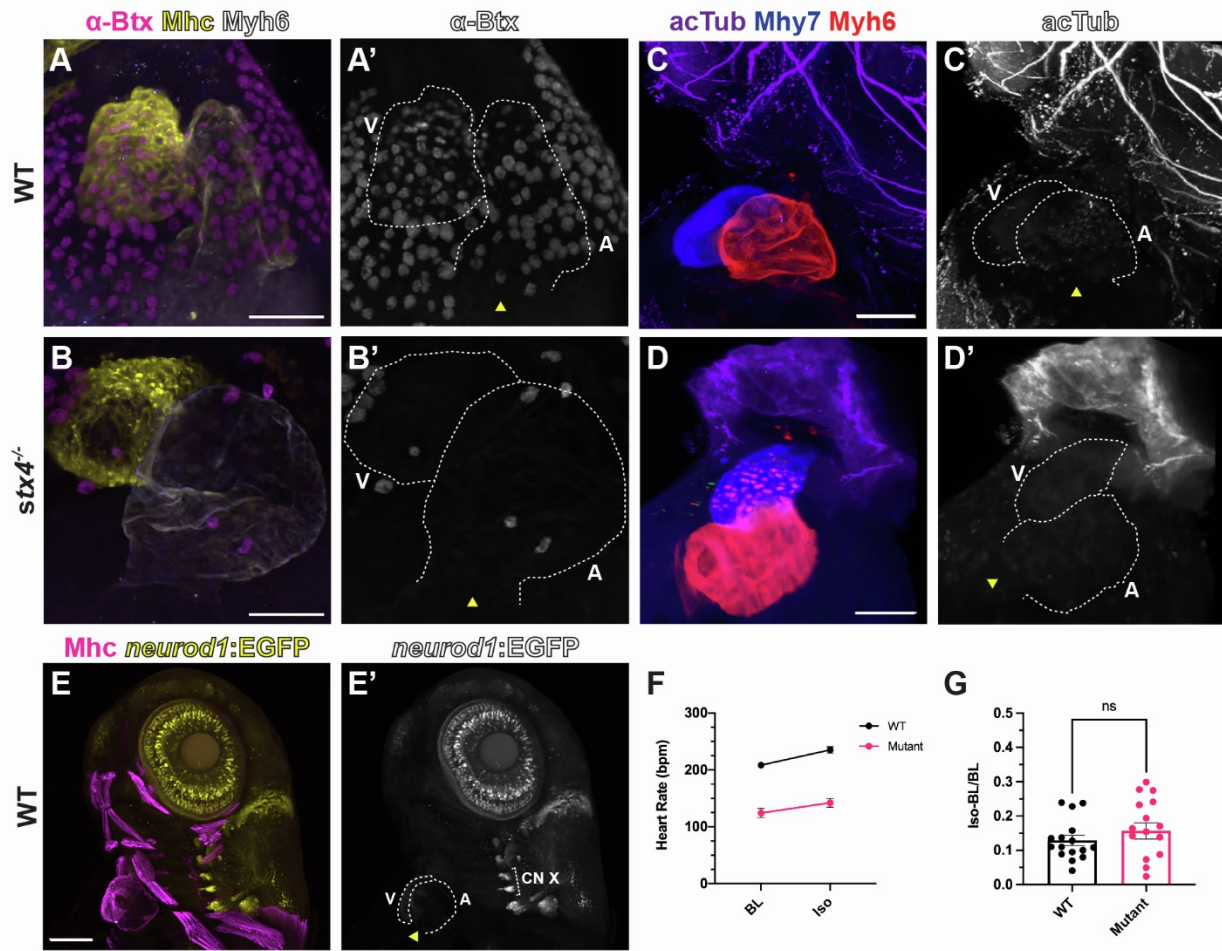

**Figure S7. *Stx4* is dispensable for autonomic innervation or stimulation by 72 hpf.** (A,B) Confocal images of hearts from 72 hpf WT and *stx4* mutant larvae labelled for Mhc (white), Myh6 (yellow), and conjugated  $\alpha$ -Bungarotoxin ( $\alpha$ -Btx), a nicotinic acetylcholine receptor neurotoxin (magenta).  $\alpha$ -Btx labelling does not label cells at the venous pole of the hearts (yellow arrowheads) at 72 hpf, suggesting there is not parasympathetic input yet at this stage. Scale bar: 50  $\mu$ M. (A',B') Single channel of  $\alpha$ -Btx staining. White vesicles around the pericardial sac are hatching gland granules. (C,D) Confocal images of 72 hpf WT and *stx4* mutant larvae labelled for Myh6 (red), Myh7 (blue) and acetylated tubulin (acTub; purple). (C',D') Single channel image of acTub. AcTub, marking axonal projections was not detected at the venous poles of the heart (yellow arrowheads). Scale bar: 50  $\mu$ M. (E) Confocal image of 72 hpf WT larvae carrying the *TgBAC(neurod:EGFP)* transgene, which labels cranial nerves including the vagus nerve, and labelled for Mhc (magenta). CN X: vagus nerve nuclei. (E') Single channel confocal image of *TgBAC(neurod:EGFP)*. No parasympathetic input from the vagus nerve is detected at 72 hpf at the base of the heart (arrowhead). Scale bar: 100  $\mu$ M. (F,G) Heart rates determined from ventricular ROIs of 72 hpf WT and *stx4* mutant larvae captured by high-speed imaging and quantified as beats per minute (bpm) and the rate of change upon isoproterenol treatment relative to baseline (iso-BL/BL), imaged both before and after 30 minutes of treatment with 500  $\mu$ M isoproterenol. Data are represented as the mean  $\pm$  SEM,  $n = 16$  larvae/group, Student's t-test. BL: baseline; iso: isoproterenol. A; atrium; V: ventricle.

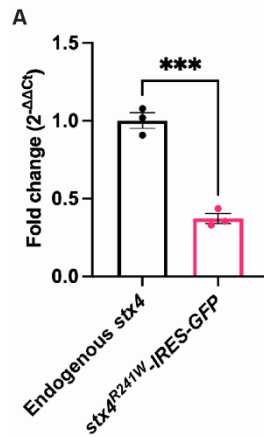

**Figure S8. Transgenic expression of *stx4*<sup>R241W</sup>-IRES-EGFP.** RT-qPCR for *stx4*<sup>R241W</sup>-IRES-EGFP expression from zebrafish hemizygous for the *actb2:stx4*<sup>R241W</sup>-IRES-EGFP transgene relative to endogenous *stx4* in WT zebrafish at 72 hpf. Endogenous *stx4* was amplified using primers internal to *stx4* cDNA; transgenic *stx4*<sup>R241W</sup>-IRES-EGFP was amplified using primers for *GFP*.  $n = 3$  biological replicates of pooled ( $n = 25-30$  embryos/pool) embryos assayed as technical triplicates. Student's t-test, \*\*\*\* $p < 0.0001$ .

## Supplemental Tables

**Table S1. Variants detected in Patient 1 by WES trio-analysis.**

| Gene Symbol                           | Chromosome (Cytoband) | Position <sup>a</sup> (Exon) | HGVS Nomenclature (Variant Type)                 | dbSNP RS ID | MIM    | ACMG Criteria                          | Zygoty in Patient 1, Segregation (Known inheritance pattern of variant: disease manifestation)                                                                                                                        | Minor Allele Frequency <sup>b</sup> |
|---------------------------------------|-----------------------|------------------------------|--------------------------------------------------|-------------|--------|----------------------------------------|-----------------------------------------------------------------------------------------------------------------------------------------------------------------------------------------------------------------------|-------------------------------------|
| Pathogenic/Likely Pathogenic Variants |                       |                              |                                                  |             |        |                                        |                                                                                                                                                                                                                       |                                     |
| <i>EXOSC8</i>                         | Chr13 (13q13.3)       | 37583420 (Exon 11)           | NM_181503.3:<br>c.815G>C;<br>p.Ser272Thr (SNV)   | rs36027220  | 606019 | PS3<br>PP1<br>PP5<br>BP4               | Heterozygous, Maternal (AR: Pontocerebellar hypoplasia, type 1C [MIM: 616081])                                                                                                                                        | 0.00385                             |
| <i>SLC26A4<sup>c</sup></i>            | Chr7 (7q22.3)         | 107312690 (Exon 4)           | NM_000441.2:<br>c.412G>T;<br>p.Val138Phe (SNV)   | rs111033199 | 605646 | PS4<br>PM2<br>PM3<br>PP5               | Heterozygous, Maternal (AR: Deafness, autosomal recessive 4, with enlarged vestibular aqueduct [MIM: 600791]; AR: Pendred Syndrome [MIM: 274600])                                                                     | 0.000175                            |
| <i>TREX1</i>                          | Chr3 (3p21.31)        | 48508395 (Exon 1)            | NM_016381.5:<br>c.506G>A;<br>p.Arg169His (SNV)   | rs72556554  | 606609 | PS3<br>PM2<br>PM3<br>PP1<br>PP3<br>PP5 | Heterozygous, Paternal (AR/AD: Aicardi-Goutieres syndrome 1 [MIM: 225750]; AD: Chilblain lupus [MIM: 610448]; AD: Vasculopathy, retinal, with cerebral leukoencephalopathy and systemic manifestations [MIM: 192315]) | 0.000208                            |
| Variants of Uncertain Significance    |                       |                              |                                                  |             |        |                                        |                                                                                                                                                                                                                       |                                     |
| <i>DSG2<sup>d</sup></i>               | Chr18 (18q12.1)       | 29104553 (Exon 7)            | NM_001943.5:<br>c.828+5C>T (SNV)                 | rs373286117 | 125671 | PM2<br>BP4                             | Heterozygous, Maternal                                                                                                                                                                                                | 0.00000806                          |
| <i>TNXB<sup>e</sup></i>               | Chr6 (6p21.33)        | 32052313 (Exon 8)            | NM_019105.8:<br>c.3322G>A;<br>p.Val1108Met (SNV) | rs121912575 | 600985 | PM2<br>BP4                             | Heterozygous, Paternal                                                                                                                                                                                                | 0.000827                            |
| <i>STX4</i>                           | Chr16 (16p11.2)       | 31050877 (Exon 9)            | NM_004604.4:<br>c.718C>T;<br>p.Arg240Trp (SNV)   | rs770931989 | 186591 | PM2<br>PP3                             | Homozygous, Paternal/Maternal                                                                                                                                                                                         | 0.00000796                          |



- a. Sequence positions refer to human reference genome hg19.
- b. MAFs were obtained from Varsome using gnomAD Exomes Version: 2.1.1 entries.
- c. Targeted deletion and duplication analysis by comparative genomic hybridization was performed by the Genetics and Genomics Diagnostic Laboratory at Cincinnati Children's and was confirmed negative.
- d. Other variants in this gene are associated with the following phenotypes: Arrhythmogenic right ventricular dysplasia 10 (autosomal dominant; MIM: 610193) and Cardiomyopathy, dilated, 1BB (MIM: 612877); however, this variant is not predicted to affect exon splicing.
- e. Other SNVs in TNXB are associated with Ehlers-Danlos syndrome, classic-like, 1 (autosomal recessive; MIM: 606408) and Vesicoureteral reflux 8 (autosomal dominant; MIM: 615963), which is not concordant with Patient 1's phenotype. A clinical testing submission of this variant were reported as "Likely Benign" on Varsome and ClinVar.

**Table S2. Variants detected in Patient 2 by WES trio-analysis.**

| Gene Symbol                           | Chromosome (Cytoband) | Position <sup>a</sup> (Intron/ Exon) | HGVS Nomenclature (Variant Type)                 | dbSNP RS ID  | MIM    | ACMG Criteria      | Zygosity in Patient 2, Segregation (Known inheritance pattern of variant: disease manifestation) | Minor Allele Frequency <sup>b</sup> |
|---------------------------------------|-----------------------|--------------------------------------|--------------------------------------------------|--------------|--------|--------------------|--------------------------------------------------------------------------------------------------|-------------------------------------|
| Pathogenic/Likely Pathogenic Variants |                       |                                      |                                                  |              |        |                    |                                                                                                  |                                     |
| <i>EIF3F<sup>c</sup></i>              | Chr11 (11p15.4)       | 8016013 (Exon 5)                     | NM_003754.2: c.694T>G; p.Phe232Val (SNV)         | rs141976414  | 603914 | PM2<br>PP3<br>PP5  | Homozygous, Paternal/Maternal (AR: Intellectual Developmental Disorder, 67 [MIM: 618295])        | 0.000701                            |
| <i>XDH<sup>e</sup></i>                | Chr2 (2p23.1)         | 31560605 (Exon 35)                   | NM_000379.3: c.3853C>T; p.Gln1285* (SNV)         | rs761545629  | 607633 | PVS1<br>PM2<br>PP3 | Compound heterozygous, Maternal                                                                  | 0.00000398                          |
| Variants of Uncertain Significance    |                       |                                      |                                                  |              |        |                    |                                                                                                  |                                     |
| <i>STX4</i>                           | Chr16 (16p11.2)       | 31045392 (Exon 2)                    | NM_004604.4: c.89_90delGC; p.Gly30Aspfs*28 (DEL) | rs1301001687 | 186591 | PM2                | Compound heterozygous, Paternal                                                                  | 0.000000000301 <sup>d</sup>         |
| <i>STX4</i>                           | Chr16 (16p11.2)       | 31045650 (Intron 3)                  | NM_004604.4: c.232+4A>C (SNV)                    | rs922762463  | 186591 | PM2<br>PP3         | Compound heterozygous, Maternal                                                                  | 0.00000399                          |
| <i>XDH<sup>f</sup></i>                | Chr2 (2p23.1)         | 31595130 (Exon 17)                   | NM_000379.3: c.1820G>A; p.Arg607Gln (SNV)        | rs45442092   | 607633 | BP6                | Compound heterozygous, Paternal                                                                  | 0.00203                             |
| <i>COL22A1</i>                        | Chr8 (8q24.23)        | 139772485 (Intron 18)                | NM_152888.3: c.1902+1G>A (SNV)                   | rs372694589  | 610026 | PM2<br>PP3         | Compound heterozygous, Paternal                                                                  | 0.0000723                           |
| <i>COL22A1</i>                        | Chr8 (8q24.23)        | 139629176 (Exon 53)                  | NM_152888.3: c.3851C>T; p.Ser1284Phe (SNV)       | rs200631977  | 610026 | PM2<br>BP4         | Compound heterozygous, Maternal                                                                  | 0.0000318 <sup>g</sup>              |
| <i>DNAH2<sup>h</sup></i>              | Chr17 (17p13.1)       | 7674168 (Exon 27)                    | NM_020877.4: c.4279G>C; p.Asp1427His (SNV)       |              | 603333 | PM2<br>PP3<br>BP1  | Compound heterozygous, Paternal                                                                  | 0.0000000000192                     |
| <i>DYSF</i>                           | Chr2 (2p13.2)         | 71797041 (Exon 27)                   | NM_003494.4: c.2902A>T;                          | rs144636654  | 603009 | PM2<br>BP4         | Compound heterozygous, Paternal                                                                  | 0.00140                             |

|                          |                     |                        |                                                       |             |        |            |                                                                                                         |                 |
|--------------------------|---------------------|------------------------|-------------------------------------------------------|-------------|--------|------------|---------------------------------------------------------------------------------------------------------|-----------------|
|                          |                     |                        | p.Met968Leu<br>(SNV)                                  |             |        |            | (AR: Miyoshi muscular dystrophy 1 [MIM: 254130] ; AR: Muscular dystrophy, limb-girdle, 2 [MIM: 253601]) |                 |
| <i>TNK2</i> <sup>j</sup> | Chr3<br>(3q29)      | 195594879<br>(Exon 13) | NM_001010938.2:<br>c.2479C>A;<br>p.Pro827Thr<br>(SNV) |             | 606994 | PM2<br>PP3 | Compound heterozygous,<br>Maternal                                                                      | 0.0000000000155 |
| <i>TNS4</i> <sup>k</sup> | Chr13<br>(17q21.2)  | 38643441<br>(Exon 4)   | NM_032865.6:<br>c.1135G>C;<br>p.Gly379Arg<br>(SNV)    |             | 608385 | PM2<br>PP3 | Compound heterozygous,<br>Maternal                                                                      | 0.0000000000200 |
| <i>OPRK1</i>             | Chr8<br>(8q11.23)   | 54142245<br>(Exon 3)   | NM_000912.5:<br>c.755G>A;<br>p.Arg252His<br>(SNV)     | rs200672427 | 165196 | PM2<br>PP3 | De novo                                                                                                 | 0.00000398      |
| <i>CACNG8</i>            | Chr19<br>(19q13.42) | 54485817<br>(Exon 4)   | NM_031895.6:<br>c.992_994del;<br>p.Gly331del<br>(DEL) | rs769981108 | 606900 | PM2<br>BP4 | Mosaic, Maternal                                                                                        | 0.0000391       |

- a. Sequence positions refer to human reference genome hg19.
- b. MAFs were obtained from Varsome using gnomAD Exomes Version: 2.1.1 entries.
- c. Previous associations were not concordant with Patient 2's phenotype;<sup>1,2</sup> however, this variant was noted as an additional finding upon postnatal re-evaluation of the WES trio-analysis.
- d. gnomAD MAF was not available. MAF computed from in-house global allele frequency.
- e. Other variants in this gene are associated with Xanthinuria, type I (autosomal recessive; MIM: 278300) and Xanthinuria, type II (autosomal recessive; MIM: 603592), which are not concordant with patient 2's phenotype or zygosity.
- f. This variant was associated with lowered activity in xanthine dehydrogenase in cell culture;<sup>3</sup> however, two clinical testing submissions of this variant were reported as "Likely Benign" on Varsome and ClinVar.
- g. gnomAD MAF was not available. MAF computed from in-house global allele frequency.
- h. An additional heterozygous maternal SNV was synonymous. gnomAD MAF was not available. MAF computed from in-house global allele frequency. Other variants in this gene are associated with Spermatogenic failure 45 (autosomal recessive; MIM: 619094).
- i. Conflicting interpretations of pathogenicity are reported for this variant in association with the listed conditions. Two additional heterozygous maternal alleles (NM\_003494.4:c.3065G>A; p.Arg1022Gln [RS ID: rs34211915] and NM\_003494.4:c.3992G>T; p.Arg1331Leu [RS ID: rs61742872]) were indicated as "Benign" by *in silico* prediction methods.

j. An additional heterozygous paternal SNV was filtered out due to quality. gnomAD MAF was not available. MAF computed from in-house global allele frequency.

k. An additional heterozygous paternal SNV was filtered out due high MAF and indication as "Likely Benign". gnomAD MAF was not available. MAF computed from in-house global allele frequency.



**Table S3. List of primer sequences used.**

| Name                          | Sequence                                                             |
|-------------------------------|----------------------------------------------------------------------|
| Patient sequencing primers:   |                                                                      |
| <i>R240W_F</i>                | 5'- CTTACCTCCCTGAACCACCC-3'                                          |
| <i>R240W_R</i>                | 5'- CTCACCTTCCTCGCCTTCTT-3'                                          |
| <i>In situ</i> primers:       |                                                                      |
| <i>stx4-probe-F1</i>          | 5'- TCGCCCCACACTGATCTCTA-3'                                          |
| <i>stx4-probe-R1</i>          | 5'- GTCCACCATCTCACCTGTG-3'                                           |
| gRNAs:                        |                                                                      |
| <i>stx4-t2 gRNA</i>           | 5'-GCTAGGAGTTGCACTTCCAG-3'                                           |
| Zebrafish sequencing primers: |                                                                      |
| <i>stx4-t2-F1</i>             | 5'- GAGATTCGAGAGGGACTTGAAA-3'                                        |
| <i>stx4-t2-R1</i>             | 5'- CCTTTTTTCATACCTGTGCTCAA-3'                                       |
| Gateway cloning:              |                                                                      |
| <i>GFP-seq-F2</i>             | 5'- AGAAGAACGGCATCAAGGTG-3'                                          |
| <i>M13 Forward (-20)</i>      | 5'- GTAAAACGACGGCCAGT-3'                                             |
| <i>M13 Reverse</i>            | 5'-CAGGAAACAGCTATGAC-3'                                              |
| <i>stx4-attB1-F1</i>          | 5'-GGGGACAAGTTTGTACAAAAAAGCAGGCTTTCAC<br>CATGCGGGACCGGACCAAAGAAGT-3' |
| <i>stx4-attB2-R1</i>          | 5'-GGGGACCACTTTGTACAAGAAAGCTGGGTTTCAA<br>GAGAACTGATAGCCAGGCA-3'      |
| <i>stx4-RT-F2</i>             | 5'-GTTTCAGGAGATTCGAGAGGGACTTG-3'                                     |
| <i>stx4-RT-R3</i>             | 5'-ACACCATGCTGAGTTCTCCTC-3'                                          |
| QuikChange II primers:        |                                                                      |
| <i>stx4R241W-QC-F</i>         | 5'-GCACAGGGTGAGATGGTGGACTGGATTGAGTCG<br>AACATTA-3'                   |
| <i>stx4R241W-QC-R</i>         | 5'-GGGACATTTTAATGTTTCGACTCAATCCAGTCCAC<br>CATCTC-3'                  |
| RT-qPCR primers:              |                                                                      |
| <i>stx4-RT-F4</i>             | 5'-CAGAGACCGAAATGTGGAG-3'                                            |
| <i>stx4-RT-R4</i>             | 5'-ATCGTGTCTGACTCAATC-3'                                             |
| <i>gfp forward</i>            | 5'-CCAGATCCGCCACAACATCG-3'                                           |
| <i>gfp reverse</i>            | 5'-GTCCATGCCGAGAGTGATCC-3'                                           |
| <i>actb2 forward</i>          | 5'-TACAGCTTCACCACCACAGC-3'                                           |
| <i>actb2 reverse</i>          | 5'-AGGAAGGAAGGCTGGAAGAG-3'                                           |

**Table S4. List of antibodies used.**

| Name                                                 | Host   | Clonality;<br>Isotype | Manufacturer                                                               | Catalogue<br>number | Dilution |
|------------------------------------------------------|--------|-----------------------|----------------------------------------------------------------------------|---------------------|----------|
| Primary antibodies                                   |        |                       |                                                                            |                     |          |
| anti-acetylated Tubulin                              | Mouse  | Monoclonal;<br>IgG2b  | Sigma Aldrich                                                              | T7451               | 1:250    |
| anti-cleaved Caspase 3                               | Rabbit | Polyclonal            | BD Biosciences                                                             | 559565              | 1:250    |
| anti-Alcama                                          | Mouse  | Monoclonal;<br>IgG1   | University of Iowa<br>Developmental<br>Studies<br>Hybridoma Bank<br>(DSHB) | zn-8-s              | 1:10     |
| anti-DsRed2                                          | Rabbit | Polyclonal            | Clontech                                                                   | 632496              | 1:1000   |
| anti-Isl1                                            | Rabbit | Polyclonal            | Genetex                                                                    | GTX128201           | 1:00     |
| anti-Sarcomeric Myosin Heavy Chain (Mhc)             | Mouse  | Monoclonal;<br>IgG2b  | DSHB                                                                       | MF20                | 1:10     |
| anti-Atrial Myosin Heavy Chain (Myh6)                | Mouse  | Monoclonal;<br>IgG1   | DSHB                                                                       | S46                 | 1:10     |
| anti-zebrafish Ventricular Myosin Heavy Chain (Myh7) | Rabbit | Polyclonal            | YenZym                                                                     |                     | 1:200    |
| anti-Syntaxin 4                                      | Rabbit | Polyclonal            | Sigma Millipore                                                            | AB5330              | 1:400    |
| anti-Vamp2                                           | Rabbit | Polyclonal            | Genetex                                                                    | GTX132130           | 1:200    |
| Secondary antibodies                                 |        |                       |                                                                            |                     |          |
| anti-mouse IgG2b Alexa Fluor®-647                    | Goat   | Polyclonal            | Southern Biotech                                                           | 1091-31             | 1:250    |
| anti-rabbit IgG(H+L) Alexa Fluor®-647                | Goat   | Polyclonal            | Southern Biotech                                                           | 4050-31             | 1:250    |
| anti-rabbit IgG (H+L) Cascade blue                   | Goat   | Polyclonal            | Life Technologies                                                          | C-2764              | 1:00     |
| anti-Mouse IgG1 DyLight™-405                         | Goat   | Polyclonal            | Bio Legend                                                                 | 409109              | 1:00     |
| anti-mouse IgG1-FITC                                 | Goat   | Polyclonal            | Southern Biotech                                                           | 107002              | 1:100    |
| anti-rabbit IgG-FITC                                 | Goat   | Polyclonal            | Southern Biotech                                                           | 405002              | 1:100    |
| anti-mouse IgG1-TRITC                                | Goat   | Polyclonal            | Southern Biotech                                                           | 107003              | 1:100    |
| anti-mouse IgG2b-TRITC                               | Goat   | Polyclonal            | Southern Biotech                                                           | 109003              | 1:100    |
| anti-rabbit IgG-TRITC                                | Goat   | Polyclonal            | Southern Biotech                                                           | 405003              | 1:100    |

### **Supplemental References:**

1. Martin, H.C., Jones, W.D., McIntyre, R., Sanchez-Andrade, G., Sanderson, M., Stephenson, J.D., Jones, C.P., Handsaker, J., Gallone, G., Bruntraeger, M., et al. (2018). Quantifying the contribution of recessive coding variation to developmental disorders. *Science* (80-. ). 362, 1161–1164.
2. Csibi, A., Cornille, K., Leibovitch, M.P., Poupon, A., Tintignac, L.A., Sanchez, A.M.J., and Leibovitch, S.A. (2010). The translation regulatory subunit eIF3f controls the kinase-dependent mTOR signaling required for muscle differentiation and hypertrophy in mouse. *PLoS One* 5,.
3. Kudo, M., Moteki, T., Sasaki, T., Konno, Y., Ujiie, S., Onose, A., Mizugaki, M., Ishikawa, M., and Hiratsuka, M. (2008). Functional characterization of human xanthine oxidase allelic variants. *Pharmacogenet. Genomics* 18, 243–251.
